# Supplementary material for: Longitudinal metabolomics of human plasma reveal metabolic dynamics and predictive markers of antituberculosis drug-induced liver injury
Source: Respir Res. 2024 Jun 21;25:254. doi: 10.1186/s12931-024-02837-8 (PMC11193241; doi:10.1186/s12931-024-02837-8)
Supplement: Supplementary file 3 — Supplementary Material 3 [file 12931_2024_2837_MOESM3_ESM.xlsx]

## Sheet: Batch-norm Imputed Data
PARENT_SAMPLE_NAME	35	50	55	62	93	98	111	112	117	132	136	144	158	171	179	180	181	182	187	189	192	194	197	207	209	212	213	229	231	234	240	241	244	250	252	254	264	266	267	272	273	275	278	279	297	302	310	313	327
DN-DIAN-11767	1.61874	1.78815	2.64221	0.215348	0.966356	2.18676	1.1262	0.960081	0.986805	0.93003	0.736352	0.356538	1.31309	1.23105	0.595064	0.462078	0.993419	3.50928	1.452	1.43416	1.17524	1.25755	1.01288	1.10624	0.516438	1.41854	0.707959	0.797985	1.30331	0.764407	1.42976	1.38709	3.45683	1.96823	0.838518	0.368438	1.08853	0.92371	1.21908	1.43255	1.28092	1.0795	1.10359	1.30026	0.533841	1.28967	0.952197	0.603716	1.30492
DN-DIAN-11768	1.37023	3.73238	1.65969	1.8713	0.743563	1.4409	0.568562	1.2843	3.50288	1.87566	0.669984	5.10075	1.3209	1.66601	3.77732	2.07164	1.75509	0.830097	1.93535	1.37615	1.01755	1.28977	1.60294	0.996823	5.20012	1.39887	0.724306	1.43182	1.17931	1.59803	1.66005	0.753837	1.42269	0.852482	0.927593	1.5019	1.17805	0.999135	2.51409	1.55671	1.45927	1.01316	1.49029	0.757859	1.68924	0.700252	0.514306	1.32339	1.68419
DN-DIAN-11769	1.0184	0.556643	0.81962	1.32602	1	1.81018	0.502897	0.905035	1.63266	0.779127	0.610135	1.29872	1.16028	1.44078	1.45394	1.59532	1.19776	1.58478	1.42325	1	0.856662	1.24898	1.21464	0.889225	1.25257	0.966181	0.671692	0.929033	0.782479	1	2.11793	1.22627	1.62586	1.27553	0.809707	1.18669	0.81469	0.891982	1.30942	2.58176	1.30107	0.944497	0.830876	0.758105	0.83959	1.28053	0.448403	1.23469	1.25848
DN-DIAN-11770	0.92337	1.52476	1.12636	0.810041	2.00054	2.03088	1.13134	1.104	0.360245	1.58646	0.775292	0.356538	0.417141	0.0610995	1.16741	1.2093	0.961006	1.88789	1.96674	1.06664	1.08981	0.291911	1.20473	1.12783	1.18172	1.34693	0.722578	0.933489	0.940827	0.692583	1.51542	1.00426	1	1.99239	0.97081	3.0527	0.417803	0.790175	0.882432	3.26033	0.980882	0.89186	0.31648	0.95386	0.665501	1.20485	1.13941	0.605362	1.6052
DN-DIAN-11771	0.928098	0.9488	1.07619	0.215348	0.746036	1.49655	1.26082	0.521184	0.558686	0.593573	1.3028	0.356538	0.829628	0.574778	0.406794	0.0856371	0.836662	2.79279	0.401185	0.814947	0.651434	0.848969	0.329313	1.1699	0.43264	0.768558	0.333314	0.417212	1.24325	0.436103	0.845086	1.57091	1.09004	1.42556	0.7632	0.210248	0.369675	0.917269	1.00121	2.21162	1.23699	0.799529	0.348353	0.942331	0.285198	1.41109	0.528426	0.372483	0.83956
DN-DIAN-11772	1.33629	2.25698	2.25337	0.359999	0.814947	0.714238	0.834063	0.950499	1.43656	0.874514	0.761043	0.930528	0.917553	0.776857	0.533033	0.290105	0.958724	1.9597	1.16339	1.85993	1.09939	0.900476	0.728604	0.883855	2.09877	1.04417	0.784805	0.487356	1.23021	1.26512	0.751008	1.0461	1.22007	0.455203	0.73479	0.252282	0.369675	1.17424	1.37546	0.521038	0.812082	0.947968	0.751448	0.843362	1.14598	0.855416	0.611269	1	0.49227
DN-DIAN-11773	0.393974	1.50628	3.49194	1.0757	1.13326	1.2967	2.37778	1.11843	1.06797	0.872112	0.75994	1.07979	1.38459	1.17096	1.4522	1.40365	3.90179	3.40093	1.20923	1.63623	1.23911	1.12551	0.329313	1.31264	1.09573	1.32313	0.911946	1.48249	1.18348	1.05821	0.846028	1.31745	0.96225	1.0151	0.927042	1.35448	0.369675	1.41887	1.31502	0.397016	0.833716	1.21986	0.726161	1.0632	1.04734	1.44369	0.886694	1.11053	1.00409
DN-DIAN-11774	1.16529	1.32108	3.64877	1.88151	1.55235	0.884357	0.941332	0.991344	0.854597	0.904671	1	0.356538	1.29727	0.0228474	1.42135	1.21915	2.24053	2.11599	1.20306	1.1088	0.940711	0.575148	0.711952	1.11612	0.729786	1.32322	0.622106	1.20539	1.12983	0.69976	0.983022	1.07038	1.09769	0.691644	0.990045	1.13476	0.369675	1.24189	1.17416	0.874264	1.13732	0.978296	0.821973	1.32771	1.18865	1.1013	0.709068	0.853818	0.789739
DN-DIAN-11775	0.334785	2.55801	1.15516	0.952323	4.89506	0.625008	0.956295	0.891916	1.14496	4.40854	0.527489	0.586365	1.16079	0.609408	1.27184	0.885816	1.24889	0.680538	1.15338	1.09591	1.48155	0.827629	1.13361	0.964372	4.13449	0.36132	0.444123	0.310246	0.79586	1.61541	1.14999	1.26866	0.76461	0.624097	1.47975	1.18916	0.369675	0.939376	0.734156	1.9636	0.787341	1.00915	5.29113	0.473435	1.26584	1.15117	0.957446	0.947029	0.946085
DN-DIAN-11776	0.334785	1.00962	0.566051	0.774129	1.07987	0.934354	1.3751	0.668189	0.998563	3.50822	1.5863	0.715253	0.844917	1.96724	1.44813	0.717058	1.00062	0.387427	0.308932	1.43626	0.736017	1.12627	1.67602	0.952366	3.09739	0.492895	0.345363	0.607526	1.2111	1.31983	1.23303	1.27441	0.652454	0.632704	0.603919	0.896413	2.1475	1.35245	1.30198	0.567696	1.21499	0.797409	0.493934	1.14823	1.01298	1.54932	1.79582	0.959258	1.70265
DN-DIAN-11777	0.716035	1.35005	1.28717	0.754127	1.3989	0.940666	0.782431	0.950329	1.3219	1.3756	1.16888	0.549181	0.93955	1.48208	0.738648	1.90323	2.19923	1.14839	0.930282	0.930658	1.13594	0.928321	1.22616	0.855532	0.947546	1.35107	0.58194	1.59846	0.763955	1.07475	0.901117	1.04995	0.048596	3.2891	0.706224	1.48787	1.58178	1.3676	1.19079	0.963832	1.52025	0.97919	0.82887	1.71045	0.901502	2.99114	0.83598	1.3045	1.7079
DN-DIAN-11778	0.524525	0.791455	1.29898	1.43647	1.8928	0.855504	0.900592	0.936763	0.360245	0.920404	1.03641	0.861234	1.01097	1.51624	0.990733	1.02648	1.33509	1.91642	0.571974	1.19747	0.888483	0.959459	0.982968	0.977441	0.698669	0.965105	0.643916	1.04822	0.955857	1.1239	0.894463	0.560902	1.31431	1.09909	0.842254	0.74877	2.30226	1.49839	1.30445	0.359854	1	0.758229	0.709463	1.18542	0.789865	1.67473	2.30987	1.05975	1.66048
DN-DIAN-11779	1.42775	1.25942	0.956876	1.4804	2.18932	0.888238	0.841723	0.734438	3.23069	0.856629	1.30498	0.356538	0.721737	0.600578	0.583226	1.40369	1.68416	1.32368	0.852796	0.887039	0.967565	0.765144	1.02286	0.937072	0.515175	1.06306	0.501299	1.69355	0.959717	0.839211	1.18417	0.660488	0.048596	2.64851	0.983876	0.431991	1.28265	1.37401	1.02438	0.575426	1.04895	0.835308	0.738195	1.8203	0.660094	1.72856	1.41183	0.824811	1.57607
DN-DIAN-11780	1.06714	0.790404	0.540604	1.3719	2.30216	0.889394	0.920989	0.758641	3.0408	1.01804	3.19553	0.78583	0.968164	1.01438	0.731008	1.31501	1.66804	0.460728	0.354819	0.861159	0.980137	0.860547	1.03292	0.992341	0.69245	0.893493	0.44777	1.74241	0.906237	1.23444	0.971978	0.701351	0.048596	1.51035	0.996935	0.724541	2.9486	1.61131	0.996456	0.400805	1.02113	0.754779	0.705237	1.72252	1.0435	0.248091	1.15759	1.20039	1.53034
DN-DIAN-11781	1.03765	1.71006	0.634683	0.508198	1.30378	3.58379	2.61172	1.09783	0.360245	0.550091	1.24797	0.480866	1.65907	1.68675	1.63858	1.23027	0.902421	0.960196	0.87099	1.33052	0.734278	1.41428	0.82511	1.19893	0.415143	0.967074	0.751447	1.24533	1.32385	0.869879	1.55882	2.38509	0.048596	2.38301	1.47635	0.915588	0.369675	0.999377	1.37979	1.88036	1.34629	1.23367	1.02259	1.43708	0.696017	0.302786	5.09856	0.827664	0.912495
DN-DIAN-11782	0.941567	2.31713	1.92198	1.8409	1.4167	1.84182	2.04957	0.917436	0.968303	1.19161	0.312864	1.99087	1.41507	2.44449	1.98955	2.0896	1.20174	1.43981	2.04599	1.15937	0.944029	1.48303	0.806053	1.00425	0.720524	0.79261	0.759864	1.97768	0.795024	1.01162	1.90372	1.79716	0.048596	1.45814	1.63668	1.25449	0.647392	0.94524	1.30382	1.57771	1.24001	1.27882	1.20449	0.881164	1.02647	0.829624	2.31777	1.05162	1.36106
DN-DIAN-11783	1.08003	2.50744	1.86389	1.23868	1.13407	1.68936	1.44172	0.736659	1.15349	0.564628	0.440344	1.40618	1.08023	1.63251	1.68019	1.03734	1.11013	1.09631	2.2571	0.881528	0.880343	1.34079	0.767684	1.54519	0.322192	1.04136	0.43674	1.45446	1.24965	0.544942	1.87638	2.13225	0.048596	0.82326	1.14158	0.592904	0.466288	0.951909	1.3203	1.85454	1.21436	1.16747	0.783644	0.86618	0.352154	0.340544	2.57543	0.660298	1.21949
DN-DIAN-11784	0.823251	2.29788	1.99105	1.49749	1.2287	1.73792	2.48443	0.883678	0.740007	0.790036	0.588012	0.356538	1.22916	3.41933	1.4994	0.967001	0.961491	1.50741	2.22515	0.999312	1.07263	1.34787	1.06371	1.46405	0.458039	0.729083	0.650886	1.87036	1.0091	0.615327	2.04653	2.99891	1.3315	1.01846	1.49141	0.427489	0.546315	0.931214	1.16762	1.62864	0.968397	1.14987	0.945211	0.977865	0.590086	0.937624	2.08986	0.674823	1.03445
DN-DIAN-11785	1.30342	6.22966	1.79157	1.66939	1.26084	1.60007	2.2206	0.942337	1.41636	2.43281	0.313222	0.678109	1.08014	2.25074	1.96193	1.12426	0.976606	0.930347	1.73027	0.957932	0.89656	1.37355	1.07682	1.51823	6.05466	0.884379	0.348346	1.5399	1.17014	1.43082	1.90251	1.92961	2.31445	1.06668	1.43191	0.892403	0.484844	0.974461	3.53707	1.64876	1.08863	1.14173	1.12286	0.890862	1.89376	0.0857356	1.90684	1.19747	1.81158
DN-DIAN-11786	1.75347	1.05094	0.307939	0.215348	1.04447	1.55169	0.796225	0.875249	1.16461	0.870723	2.79414	1.51351	0.875628	0.75227	0.406794	0.869725	0.998175	0.298531	0.392463	0.923917	0.857472	1.0733	0.706634	1.13154	1.11547	0.827628	0.931571	1.13441	1.74626	0.538611	0.698113	0.964718	1.05981	0.960933	1.01706	1.72628	1.40482	1.44765	1.22311	0.137363	1.41816	0.997493	0.373862	0.745968	0.619607	1.35094	0.989097	0.987865	0.824456
DN-DIAN-11787	1.46119	1.53262	1.76793	0.754405	1.05758	0.842175	0.726874	0.750881	1.32097	2.66939	1.13857	0.989267	0.914577	0.854385	0.723715	1.49581	0.979438	1.56087	1.44736	0.701818	1.14013	1.19975	1.03903	0.979831	1.01352	0.74116	0.722327	1.35833	1.57023	0.582522	0.780022	0.961507	0.614096	0.53182	0.970229	1.93634	1.16276	1.27811	1.12292	0.542885	1.14616	0.880677	0.530731	0.973527	0.968332	0.527025	0.910046	1.01613	1.12109
DN-DIAN-11788	1.57775	1.08825	1.3077	0.837371	0.952769	0.788915	0.702577	0.978199	1.12624	0.449066	1.60919	0.513306	1.05245	0.577637	0.908614	1.52349	1.09856	1.06526	1.09642	0.765116	1.06691	1.13007	0.602909	0.957264	0.97306	0.932809	0.998952	1.31437	1.67922	0.573186	0.771063	0.859462	1.742	0.582508	1.00451	1.86203	0.872923	1.46836	1.05298	0.137363	1.02835	0.988243	0.555822	0.91658	0.638931	0.565007	1.0175	0.83871	1.03472
DN-DIAN-11789	1.40071	1.34585	1.71327	0.724139	0.927114	0.782951	0.743932	0.730881	1.383	1.37067	1.2677	1.37882	0.79135	1.10242	0.966336	1.83537	1.35954	1.44336	1.52698	0.847065	1.06382	1.22264	1.25482	1.13226	2.74989	1.11716	0.850148	1.51959	1.72148	0.618252	0.995174	1.10914	1.2068	0.607717	0.855686	1.63062	0.369675	1.34259	1.04915	1.31649	1.25556	0.989709	0.810995	0.851591	1.42745	0.677798	0.730976	1.00272	1.39919
DN-DIAN-11790	1.70173	0.750547	1.21445	0.494971	1.06615	0.684297	1.27525	0.740721	1.00144	0.506941	1.48017	1.40561	0.829139	1.44156	0.651525	0.986882	1.07618	0.857275	0.94339	0.867534	1.22725	1.33409	0.846954	1.10349	1.78409	0.825085	0.800945	1	1.62233	0.786749	1.00593	1.29498	1.26666	0.68165	1.03154	0.938168	1.47636	1.32434	1.11235	1.53741	1.45965	1.01984	0.458302	0.85547	1.19068	0.706632	0.833582	1.03707	1.16367
DN-DIAN-11791	1.0922	0.818239	1.06234	0.370063	1.07357	1.15284	1.04458	0.648405	0.360245	1.45885	1.32255	0.5939	0.856429	1.41443	0.406794	0.234655	0.990742	2.76102	0.621658	1.19363	0.76977	0.940273	1.34338	1.24535	1.17899	0.994717	0.600325	0.40869	1.33621	1.23782	1.36469	1.1571	1.95283	0.974125	0.845196	0.306145	2.64083	1.29491	1.30373	0.517879	1.25413	0.999216	0.686654	0.86604	0.956074	1.62252	1.92169	0.907658	0.884365
DN-DIAN-11792	1.13669	0.673011	1.43502	0.639144	0.995155	0.749229	1.23175	0.870956	0.68977	1.24195	1.59845	0.650819	1.05024	1.92452	0.77355	0.441432	0.851922	2.12226	1.07463	1.86476	1.1191	1.06522	1.81881	1.08061	1	1.25218	1.11641	0.469701	1.04999	1.34894	1.35784	1.45241	2.34004	1.70923	0.751091	0.274934	2.34428	1.21361	1.45198	0.832918	1.29408	1.20596	1.30287	0.869091	1.01943	1.66354	2.83371	0.460532	1.35776
DN-DIAN-11793	1.54826	0.593636	0.588246	0.881626	1.21116	0.550545	0.997992	0.804866	0.360245	0.827472	1.23118	0.356538	0.877134	0.932401	0.66265	0.965066	0.848955	0.825277	0.891014	0.980754	1.28409	0.902816	0.940168	0.98289	0.625744	1.14891	0.589117	0.726593	1.37565	1.24422	1.01512	1.06142	1.52653	0.778795	1.16318	1.39663	2.68778	1.14047	1.29632	0.62748	0.720876	0.940937	0.64831	1.38982	0.514962	1.25085	1.75449	0.698555	1.2618
DN-DIAN-11794	1.12405	0.966808	1.02089	0.578347	1.02754	1.52868	0.767473	0.861233	0.360245	0.76919	5.48726	0.967776	1.31372	1.19986	1.42975	0.854479	0.805029	1.16028	1.06292	1.32123	0.939666	1.08303	1	1.1249	0.397628	1.53568	1.01991	0.719082	1.39269	1.21268	1.28883	1	1.194	0.96537	0.976938	1.56787	2.36401	1.06951	1.09262	1.00484	1.39722	1.01075	0.824493	1.11989	0.490927	2.13039	1.27006	0.608804	0.910299
DN-DIAN-11795	1.2736	0.996569	1.26976	0.215348	1.03917	0.492246	1.54194	0.839554	0.990878	1.23314	0.424408	2.11569	0.95591	1.18764	0.603703	0.587714	0.761764	1.59312	1.30682	1.17279	1.18973	0.960523	1.07653	0.971937	0.646285	1.27426	0.914338	0.561	1.38108	1.08582	0.97858	1.09336	1.68391	0.656389	1.08951	1.68638	1.778	0.976809	1.24591	0.137363	0.752848	1	0.735433	1.42005	0.520326	1.92525	2.05598	0.58404	0.926857
DN-DIAN-11796	0.906872	0.891082	0.263963	0.384374	1.34056	0.639508	0.81744	0.889824	1.06306	1.30811	9.03534	0.356538	0.775514	0.44427	0.497519	0.748842	0.839692	0.217344	0.235966	0.862413	0.550159	0.827828	0.329313	0.845153	1.98495	0.63015	0.665978	0.650565	0.527793	1.10245	1.02622	0.836689	1.09214	0.980976	1.37172	1.4746	0.9433	0.980119	1	1.20869	0.839795	0.969582	1.26733	0.965569	1.30677	3.47941	0.413451	1.19667	0.796327
DN-DIAN-11797	1.24012	0.172105	0.28797	0.867422	1.25383	1.60257	1.63562	1.03135	0.66021	0.837854	1.82298	0.498754	0.97629	0.0853431	0.834487	1.50355	0.815072	0.326178	0.319895	1.18884	0.658654	1.00915	1.08027	0.870456	0.81181	0.896015	1.15	1.47675	0.524792	1.1397	1.21627	0.842874	1.82965	1.55949	1.21265	1.16566	0.369675	1.27841	1.04474	0.78626	1.31349	1.23435	2.12119	1.40722	1.15172	3.6758	0.617973	1.26112	0.9257
DN-DIAN-11798	1.19557	0.496495	0.540255	0.616792	1.16195	1.16182	1.10318	1.05108	0.553471	0.941533	0.828231	1.48522	0.873214	0.0675733	0.721458	0.55753	0.786902	0.299424	0.307586	1.0132	0.809729	0.707776	1.08429	1.06697	1.45221	0.669688	0.829725	0.590272	0.693047	1.10856	1.03983	0.888688	0.888905	1.72974	1.23928	0.782554	0.792438	0.861122	0.808838	0.628519	0.718729	1.01139	1.38001	0.527708	1.15738	3.18582	0.863037	0.607083	0.49227
DN-DIAN-11799	1.41404	0.286563	0.289654	0.28612	1.69499	1.68058	1.0911	0.813189	1.67604	1.81778	2.445	0.356538	1.23375	0.182963	0.783155	0.603197	1.09051	0.309723	0.38698	1.34088	1.02097	1.55297	1.69606	1.348	1.65443	0.854833	0.882147	0.633536	0.363925	1.64735	1.45841	1.1411	2.25118	1.43233	1.40807	0.553945	0.686034	0.894575	0.923494	2.25512	1.47341	1.25997	2.0751	1.12161	1.59245	2.38195	0.928344	1.0079	1.02003
DN-DIAN-11800	1.20423	0.535631	0.467919	0.404872	1.82836	1.69085	1.55449	1.00849	0.360245	1.76613	3.56548	2.70978	0.810414	0.405792	0.797222	0.871116	0.984193	0.452016	0.270426	1.89623	0.744548	1.18574	1.76392	1.17088	3.84932	0.852245	0.686902	1.21715	0.669879	1.717	1.23884	1.38637	1.09189	1.71541	1.56205	1.16032	0.962533	1.17033	1.15886	2.1582	1.4049	1.21539	2.17654	0.958501	2.4025	4.7339	0.626128	1.37922	1.33658
DN-DIAN-11801	1.22813	0.765716	0.315294	0.388343	2.00161	1.01649	2.35793	1.1839	0.609771	1.13347	2.2766	1.51097	0.939058	0.0859612	0.851048	0.939306	0.878252	0.270056	0.109993	1.29865	1.0212	1.08443	1.59503	1.19623	1.53137	0.846765	0.896648	1.4891	0.617852	2.17899	1.85645	1.54245	1.15533	1.23352	1.36559	0.934047	1.48753	0.968758	1.16496	3.14448	1.00034	1.36009	2.1904	0.976624	1.22376	1.10167	0.962928	0.875509	0.49227
DN-DIAN-11802	0.924983	0.340239	0.824587	0.801301	0.937217	1.3742	1.16382	0.811841	0.360245	0.938192	2.72621	0.356538	1.19064	0.519647	1.05304	1.09602	0.821623	0.431328	0.476912	0.85039	0.92635	0.902149	0.847492	0.938786	0.807977	0.766695	0.599631	0.484892	0.57559	1.10862	1.19027	0.634512	0.048596	1.43397	1.14375	0.862091	0.558747	0.935902	0.751274	1.61896	0.814393	0.901789	0.781463	1.40163	1.53218	0.886148	1.65717	1.22589	0.766357
DN-DIAN-11803	1.426	1.01635	1.79082	1.99823	0.900967	1.26622	0.698913	0.861778	1.58285	1.2333	0.742986	0.356538	1.38665	0.932332	1.64417	2.19751	0.95607	1.03486	1.27909	1.29566	1.2236	1.4732	1.42758	1.1544	0.733543	1.03219	1.46747	1.15704	1.00022	1.33772	1.54442	0.936484	0.0790708	2.06466	0.992575	0.896945	0.369675	1.21559	0.982803	3.46589	1.36286	1.18637	1.36601	1.19092	1.71781	1.17366	1.70592	1.4014	1.42554
DN-DIAN-11804	0.739051	0.565736	2.29877	2.85971	0.93894	1.14456	1	0.917931	0.781859	1.00422	0.279103	0.356538	1.7815	1.81203	2.29179	1.7037	0.898486	1.03237	0.954506	0.880392	1.13859	1.20364	1.11243	0.976151	0.524506	0.826745	0.907856	1.14868	0.522284	1.29276	1.27938	0.876742	0.048596	1.21668	0.879678	1.62852	1.41464	1.1084	0.742217	2.58781	1.1611	1.039	1.2066	1.39197	1.12333	0.910864	1.24812	1.15305	1.04893
DN-DIAN-11805	0.930071	0.684401	1.2569	2.02707	2.74403	0.98655	1.57114	0.975487	1.21628	1.23801	1.52352	0.356538	0.880863	0.0162413	1.46594	2.29163	0.865111	1.13207	1.0877	1.03626	1.12033	0.518253	0.897716	1.07206	0.528634	1.05883	0.828898	1.33927	0.657732	1.07733	1.00585	0.821021	0.762686	0.776943	0.997225	2.1867	0.369675	0.989729	0.774468	2.76973	1.16772	0.898296	0.575041	1.28662	1.42413	0.833922	1.44454	1.20942	1.02252
DN-DIAN-11806	1.11142	0.608481	0.432158	1.22035	1.28977	0.966955	0.81773	0.965896	1.12314	0.930049	1.41021	0.459847	1.28987	0.284652	1.3083	0.989541	0.764706	0.307525	0.488888	1.2512	1.09394	1.01693	1.01239	0.695291	0.511904	0.897555	0.720998	0.637267	1.03109	1.03759	1.13713	0.769734	0.15655	1.30633	0.982893	0.522045	1.41957	1.09332	0.898313	1.70778	1.09335	0.910519	1.60628	1.26816	1.35261	1.3452	2.73201	1.1383	1.14
DN-DIAN-11807	0.726471	1.08041	0.440133	0.738197	0.803208	1.44699	0.949046	1.2248	1.27881	0.627189	0.629295	1.12021	0.743042	1.01551	1.07732	1.27369	1.38247	0.504469	0.193486	0.712407	0.748885	1.03359	1.09472	1.05831	0.5701	1.16848	0.817469	1.13515	0.722368	0.939826	0.823009	0.58699	0.861644	2.18924	0.949494	1.65029	0.369675	1.40155	1.0307	0.502101	0.881885	0.946461	0.867898	1	1.26549	0.471601	0.358127	1.47329	1.26928
DN-DIAN-11808	0.719775	2.16626	1.86723	1.39473	0.865572	0.912558	0.94232	1.4426	1.31616	0.828555	0.212622	2.98913	1.42308	1.64891	2.11292	1.85661	1.9308	1.88991	1.87684	0.859737	1.04397	1.65617	1.2735	1.21512	0.635427	1.5056	1.29145	1.6897	0.466991	0.90297	1	0.886828	0.920908	0.666854	0.994274	5.46564	0.369675	1.38981	1.10773	1.11084	1.17519	1.00983	0.712136	1.16059	1.81303	0.493752	1.01665	1.53773	1.32598
DN-DIAN-11809	1.23439	2.59384	1.36324	0.645666	1.3895	1.02912	1.57462	1.19814	1.57289	0.882397	1.11308	1.10299	1.06762	1.21046	0.70442	1.35124	1.55632	1.98661	2.10617	0.917016	1.11592	1.39346	1.243	1.3891	0.611502	1.3355	1	0.807462	0.798495	1.00765	1.15492	0.895166	0.270375	0.468392	1.37961	2.71082	1.15434	1.177	1.22629	0.606832	0.78863	1.05018	1.04527	1.40021	1.92283	0.0857356	1.23827	1.4864	1.14706
DN-DIAN-11810	0.761246	1.96894	1.07394	2.43333	1.38201	1.39444	3.84428	1.99899	0.859038	0.77005	0.372716	0.651136	0.68717	1.32813	3.71109	3.20124	2.34901	1.38404	1.84676	0.696195	1.23374	0.920778	1.18888	1.19217	0.88605	1.08706	0.970555	3.08156	0.473144	0.840006	1.09678	0.822488	0.826912	0.62453	1.13252	7.09905	0.369675	1.13878	1.26501	0.895861	0.775504	0.964303	0.812672	0.958689	2.26076	0.526452	1.1917	1.98383	1.23664
DN-DIAN-11811	0.863074	2.54333	1.15093	1.6803	0.503425	0.798315	0.974109	1.17596	0.360245	0.699367	0.388109	0.356538	1.15645	0.937462	1.7981	1.02525	1.35262	1.04885	1.53224	0.783713	1.29719	1.17314	0.728841	0.997979	0.251088	1.16874	1.53145	1.32919	1.07306	0.767824	1.06441	0.77018	0.048596	1.48258	0.72577	0.310903	0.369675	1.36999	1.01347	0.177482	0.750209	0.955588	0.620048	0.962653	0.945051	0.493139	1.22536	1.18136	1.19967
DN-DIAN-11812	1.08199	0.90965	0.275907	0.215348	0.61484	1.42565	0.703207	1.15649	0.552734	0.97519	1.6588	0.356538	1.01668	1.7825	0.724554	1.32737	0.930503	0.749693	0.251523	0.975737	1.08347	1.29712	1.10741	1.46941	1.37726	1.32014	1.13613	2.39812	1.49654	0.781368	0.898643	0.928254	0.048596	1.44815	0.983906	3.95388	0.955775	1.06081	0.754649	0.979528	1.03327	1.01163	0.717773	0.963311	0.94267	1.34732	0.688035	0.782679	0.49227
DN-DIAN-11813	0.334785	0.913895	0.405193	1.2206	1.09866	1.63562	0.199911	1.44174	0.360245	0.952045	0.363034	1.42577	1.18295	1	1.33918	2.11929	1.13627	2.12457	1.29768	0.868722	1.48585	1.34689	1.21137	1.16634	1.29689	1.22608	1.07017	2.29195	0.844124	0.783734	0.738257	0.260682	0.048596	1.60039	1.14363	7.87266	1.55922	1.05742	0.643075	3.95494	0.916222	0.99857	0.664786	1.16917	1.03222	1.83599	0.558995	1.21235	1.15026
DN-DIAN-11814	0.695236	1.04932	0.425206	1.08586	0.847541	1.16147	0.33142	1.2317	1.50727	0.612725	0.328622	0.953885	1.3704	1.18083	1.44129	1.95736	1	1.29651	1.43108	1.08296	1.08069	1.41025	1.07948	1.18467	1.44104	1.1743	1.14808	2.01108	1.09942	0.694016	0.749319	0.261864	0.823955	0.846091	0.964761	6.99463	0.369675	1.09896	0.740898	2.65722	0.837718	0.924611	0.8149	0.796472	0.841009	0.75056	0.951688	0.784939	1.26394
DN-DIAN-11815	0.334785	1	0.538169	0.961246	0.954089	1.87486	0.199911	1.83498	0.360245	3.12705	1.18246	1.72138	0.976123	0.956991	1.18346	2.91851	1.24092	1.85566	1.20379	0.673	0.905796	1.05486	1.36564	1.20207	2.64116	0.983455	0.747682	3.44462	0.869099	0.621158	0.755292	0.260682	1.19764	1.1076	1.10715	19.1265	0.369675	1.17356	0.661911	0.932184	0.40766	0.891666	0.491388	1.42905	0.859205	1.82812	1.16898	0.889384	0.80511
DN-DIAN-11816	0.807864	1.0608	0.195248	0.215348	1.06611	1.11946	1.58557	1.216	0.764941	1.22302	2.9793	3.77905	1.44219	1.6166	0.644911	1.03896	0.941857	0.742289	0.831693	1.13544	1.70613	1.53604	1.3016	1.03093	1.21442	1.2675	1.30346	1.34823	1.54329	0.914207	1.19324	0.85501	1.30527	2.60606	1.26895	0.66431	0.369675	1.18975	0.768478	2.06159	0.842898	0.986719	1.36299	1.35972	1.38864	3.77383	1.91938	1.17209	1.017
DN-DIAN-11817	1.31851	1.22375	0.381952	0.442978	0.606236	0.9182	0.99579	0.8427	0.772036	0.948685	1.6138	0.593187	1.35625	0.934146	0.676804	0.545934	0.865884	0.795598	0.510182	0.762214	0.865865	1.02064	0.632873	1.06783	1.01866	0.948127	0.917011	0.868297	1.24293	0.767524	0.976236	0.709593	0.048596	1.33845	1.03327	0.462414	0.369675	0.883162	0.86897	0.569746	0.940955	0.845216	1.0026	0.972905	0.549524	1.14463	0.811129	0.71442	0.49227
DN-DIAN-11818	0.874188	2.41999	0.925231	1.4818	0.810602	0.449034	0.977661	0.877921	1.29012	0.539336	0.432434	0.445535	1.38117	1.06883	1.13504	1.31993	1.26201	0.94991	1.59154	0.707555	0.966007	1.01251	0.765294	1.20318	0.536346	0.803645	0.77119	1.16307	0.839968	1.00574	0.947031	0.416518	1.13704	0.86171	0.886277	1.20461	1.05013	0.917686	0.818897	0.79647	0.842615	0.912594	0.994556	0.517881	0.826578	0.695873	0.993926	0.86773	0.49227
DN-DIAN-11819	0.729376	1.07806	0.960841	1.46133	1.04022	0.393915	0.683005	0.99304	0.360245	0.611942	1.23151	0.356538	1.355	1.64831	1.2218	1.34316	1.05668	0.678011	1.62574	0.705782	1.10147	0.994971	0.84955	0.741195	0.439583	0.755073	0.687596	1.24146	0.52119	1.10394	0.846399	0.673403	0.048596	1.09341	0.889416	1	1.331	0.911359	0.748221	0.137363	0.52479	0.794233	1.98074	0.453554	0.860175	0.661741	0.85842	0.882638	0.53132
DN-DIAN-11820	0.830961	1.53392	1.38127	1.11808	1.37149	0.475474	0.861401	1.42821	0.913311	0.441973	1.70917	1.22274	1.78692	1.07682	1.14129	1.31863	0.893851	0.791709	1.68331	0.700067	0.952624	1.01513	0.621175	0.982434	0.197473	0.870394	0.926713	1.46508	0.806052	0.697958	0.914357	1.19905	0.048596	1.01991	1.12632	1.83107	0.576145	0.982816	0.753812	1.02243	0.489152	0.877939	1.29326	0.517757	0.628102	0.61998	0.972888	0.808846	0.539153
DN-DIAN-11821	0.381158	2.109	1.11572	1.3223	1.43304	0.402653	1.97013	1.4057	0.865101	0.567584	0.763232	0.356538	0.925653	1.30768	1.39027	1.62993	1.00268	0.644381	1.61903	0.576376	0.859175	0.872666	0.584548	0.717795	0.223474	0.701551	0.626846	1.54085	0.72096	0.918645	0.856508	1.39865	1.03857	0.873324	1.25568	1.74331	0.369675	0.924993	0.729402	0.916405	0.508779	0.805165	1.0725	0.528843	0.507267	0.699963	0.702876	0.637467	0.49227
DN-DIAN-11822	0.716292	1.27527	0.229306	0.282856	0.934976	0.634885	0.69415	1.06703	0.38717	1.07294	3.06406	1.01073	0.974087	1.11198	0.460974	0.283026	0.588587	2.83986	0.684853	0.527292	0.725588	0.944501	0.845308	0.950439	1.32661	0.703654	0.797194	0.222662	0.808402	0.916079	1.11994	1.08964	0.590054	2.16368	1	2.10475	0.369675	0.664311	0.65396	0.443466	0.749031	0.838301	0.522855	1.30529	0.943629	0.239074	0.608214	0.481735	0.49227
DN-DIAN-11823	0.629842	1.14971	1.7589	1.89805	1.03274	1.34325	0.989072	1.14157	1.17526	0.859977	0.336324	2.60761	1.13806	1.73412	0.853189	0.488599	0.744694	3.43292	1.46718	0.892407	1.29996	1.45714	1.50028	1	1.44784	1.03582	0.985514	0.342696	0.555068	1.193	1.27423	1.07891	0.048596	0.888685	1.13228	1.04506	0.369675	0.736028	0.760185	0.539671	0.878511	0.840885	0.807101	0.807529	2.02637	0.0857356	0.899407	1.58069	0.712323
DN-DIAN-11824	0.832005	1.88489	1.57275	1.35905	1.0637	2.51335	1.28897	1.50281	0.70103	1.12553	0.684017	2.48598	1.75063	3.40012	0.542058	0.689429	0.765079	3.68288	3.05263	1.00545	1.55627	1.59426	1.50061	1.2142	1.58336	1.38262	1.22243	0.595767	0.815413	1.58603	1.61426	1.48205	0.2236	0.752767	0.932881	0.5904	0.965535	1.03837	0.950792	0.137363	1.01509	0.848362	0.916712	1.44291	2.33092	0.0857356	1.88614	1.74331	0.711937
DN-DIAN-11825	0.796736	1.35305	2.62126	1.31615	0.90557	0.92075	0.692815	1.3233	0.360245	1.59892	0.212622	1.10347	1.22428	1.36066	0.528369	0.278204	0.743954	1.64409	1.75611	0.810143	1.23893	1.23335	1.27458	0.955078	1.25969	0.958959	1.01072	0.406673	0.716586	0.982367	1.30911	1.39266	0.435627	0.28112	1.18687	0.231998	0.369675	0.734153	0.702012	0.995162	1.07236	0.885096	0.619111	1.03969	1.41901	0.0857356	1.56037	0.893658	0.49227
DN-DIAN-11826	0.855762	1.41108	1.42444	1.10571	1.20601	1.00341	0.943718	1.61581	1.21001	1.28556	0.635143	4.28081	0.92761	0.324196	0.528417	0.80308	0.923922	1.81672	2.22767	0.785405	1.2779	1.45703	1.34911	1.26072	0.948933	1.3143	0.908757	0.83997	0.647195	1.08787	1.6022	1.41317	0.048596	1	1.24079	0.27747	0.52573	0.945233	0.780429	1.36992	1.11174	0.862311	0.886982	1.25658	1.77206	0.0857356	1.57859	1.14132	0.831429
DN-DIAN-11827	0.372663	0.354848	0.990943	1.23512	1.16605	1.06965	1.73891	1.09128	1.76301	0.593622	0.212622	0.363523	0.910985	1.83602	0.573453	1.4147	1.01265	0.42716	0.371889	1.14065	0.80393	1.16456	0.716669	0.825338	0.436003	1.09099	0.892233	1.39777	0.787101	0.908853	0.887705	1.13488	1.34297	2.46714	1.05932	1.31282	0.588459	1.264	0.482322	0.806874	0.955234	1.07366	0.260529	1.01847	0.704081	1.10489	0.588327	0.934131	0.49227
DN-DIAN-11828	0.707135	0.613906	2.28509	1.41352	1.34178	0.535265	0.928583	1.20327	1.45827	1.24934	0.324279	0.832013	0.775549	0.969567	0.841566	0.939759	0.851296	0.763938	1.0887	1.00145	0.798825	1.11083	1.01967	0.987891	0.711734	0.772839	0.716302	0.723154	0.867546	0.676202	0.889452	1.36685	0.850751	1.52894	1.30183	1.80347	0.773991	1.37653	0.477221	0.885332	0.77154	0.969449	0.260835	0.909622	0.378296	0.907736	0.49314	0.789945	1.12925
DN-DIAN-11829	0.948951	0.540266	1.44264	1.15488	1.22111	0.553684	0.925823	1.29381	0.797744	0.481543	0.470811	1.22507	0.876451	0.901348	0.78035	0.836719	0.89614	0.769451	1.37926	1.16731	1.04505	1.1478	0.884436	0.856641	0.387891	0.985553	1.01201	0.764033	1.10855	0.800088	0.737017	1.35499	0.521708	1.73996	1.16893	1.63664	1.40521	1.46396	0.667595	0.788601	0.886461	1.08381	0.67352	0.892896	0.628048	1.06737	0.680211	1.09387	1.12382
DN-DIAN-11830	0.887704	0.719486	2.14837	1.9046	1.02443	0.649228	0.872454	1.00046	1.11354	0.860574	0.414022	1.05239	1.17717	1.24374	0.827205	1.27368	0.895026	0.842151	1.42891	1.38159	1.23492	1.32026	1.06015	1.05687	0.401227	1.17313	1.37913	0.942471	1.09377	0.756109	0.904733	0.626375	0.048596	1.02771	1.1784	1.32369	1.31354	1.94682	0.547557	0.679652	0.866974	1.12176	0.669207	1.08572	0.548206	0.820397	0.548009	0.942117	1.56773
DN-DIAN-11831	0.563857	0.331189	1.27143	1.09218	1.11754	0.434319	1.67614	1.54477	0.670918	0.641627	0.325719	0.577773	0.70796	1.02982	0.469717	0.811971	0.765969	0.753306	1.12109	0.906754	0.922024	0.958971	0.552764	1.11626	0.285973	0.645139	0.764589	0.53804	0.787804	0.832966	0.651476	0.260682	1.2246	1.01397	1.14879	1.0084	1.70528	1.62535	0.493099	0.700009	0.68218	0.876984	0.699729	1.12661	0.705392	1.41981	0.64814	1.15979	1.00745
DN-DIAN-11832	0.987294	0.77341	1.27801	1.02833	1.28513	1.34852	1.0956	1.33991	0.74631	1.96261	1.32749	0.511888	1.30608	0.0792259	0.943583	1.62888	0.880017	0.247781	0.432511	1.2133	0.786727	0.980687	1.54667	1.07945	1.53168	1.14351	1.25812	2.47507	0.654934	1.1185	1.22193	1.06872	0.693749	1.74883	1.33514	2.06144	0.369675	1.13141	1.09799	1.45703	1.14762	1.14769	2.52619	1.01805	1.97956	3.81622	0.385767	1.5964	0.930091
DN-DIAN-11833	0.751081	0.124326	0.234809	0.821585	0.982793	1.43817	1.43608	1.3908	0.360245	1.14616	0.608795	1.11684	1.00206	0.279307	0.981262	1.14336	0.858046	0.380454	0.208131	1.10751	0.821157	1.19319	1.68843	1.30418	1.05491	0.91492	1.7293	1.57192	1.1067	1.35668	1.07804	0.930557	0.906795	1.82389	1.23855	1.29144	0.369675	0.959425	0.861458	1.0334	0.94075	1.39943	1.52419	0.911613	1.5864	2.20231	0.721637	1.14325	0.49227
DN-DIAN-11834	0.823536	1.00189	0.606348	0.215348	1.46185	1.15426	1.47135	1.23262	0.360245	1.23777	1.28415	1.0762	0.713535	0.782148	0.406794	0.915147	0.912173	0.552864	0.333946	0.756706	0.825445	0.736784	1.0412	0.708807	1.16142	0.672975	0.951757	0.643399	0.589871	1.3105	0.907322	0.858731	1.41849	0.753579	1.32207	0.928963	0.369675	0.866263	0.643269	1.41889	0.772771	0.86855	1.47195	1.17411	2.22501	0.881453	0.507315	1.48204	0.719415
DN-DIAN-11835	1.33935	2.87861	0.940704	1.14225	2.06653	2.11933	1.87318	1.73202	2.68656	1.39734	0.879996	0.827763	0.876094	0.354278	1.87424	0.861298	1.14618	0.137845	0.488875	1.88741	0.775195	1.16433	1.40918	1.24134	1.75807	0.957785	1.0435	1.05157	0.907414	1.0896	1.04453	1.84537	0.048596	0.575656	1.71425	1.23209	1.47485	0.965861	1.01059	2.11651	0.986534	0.930198	2.23146	0.775943	2.21106	1.38465	1.57549	1.71533	1
DN-DIAN-11836	1.10454	0.66524	0.402999	0.878204	1.99614	0.987911	2.19024	1.64029	1.05578	1.7328	1.17639	0.57329	1.01744	0.538972	0.738748	0.538685	0.753355	0.286094	0.329269	0.730082	0.623756	1.09809	1.46753	1.23059	1.37938	0.833917	1.31192	0.64728	0.443289	1.34762	1.29735	2.02582	0.048596	1.88311	1.89097	0.895935	0.369675	1.04579	1.06119	1.60702	1.1431	1.05211	1.7677	0.653141	2.37366	0.454328	1.25449	1.63449	0.798997
DN-DIAN-11837	0.700275	0.161624	0.276865	0.746307	1.12259	1.0757	1.11472	1.01365	0.360245	0.995853	0.940845	1.31543	0.829816	0.359298	1.25871	0.646553	1.19487	0.305241	0.293832	1.02718	0.742034	0.817684	1.01463	0.980893	4.52614	0.600118	1.03631	0.413639	0.567894	1.25797	0.886054	1.08688	1.54451	0.925997	1.15288	0.675448	0.369675	0.916326	1.19802	0.618233	1.07266	0.844806	1.56227	0.886963	2.5559	1.10683	0.562294	1.67731	0.780867
DN-DIAN-11838	1	0.431448	0.260799	0.700042	0.855885	1.92751	2.36983	1.01952	0.713543	1.16215	0.449511	0.420299	1.15319	1.01795	0.670529	1.29568	1.02232	0.36157	0.395617	1.29467	0.774737	1	0.864793	1.04245	1.08731	1.16495	1.30926	1.26724	1.3806	1.14947	1.2627	1.38988	0.048596	1.18911	1.42203	1.05556	0.369675	0.73356	1.3125	0.137363	0.873479	1.13216	2.05618	1.1549	1.38682	0.866379	1.5164	0.930364	0.685914
DN-DIAN-11839	0.819379	1.71032	1.04069	0.971668	0.784456	0.876265	0.717849	1.04977	0.360245	1.34282	0.752205	0.52861	0.971037	1.24504	1.45208	1.63462	1.11376	1.1368	0.76685	1.31203	0.95467	0.853534	0.960666	1.15202	1.01241	1.04725	1.53055	1.39423	1.29195	1.30893	1.0921	0.835227	0.806377	0.800566	1.58887	2.7238	0.369675	0.767615	1.17426	0.587153	0.623898	1.01625	2.27118	0.61605	1.0711	0.956229	1.31378	1.13457	0.653482
DN-DIAN-11840	0.974764	1.51577	0.986671	1.87188	0.857443	1.10884	1.45542	0.977549	0.360245	0.77651	1.17149	0.40162	1.17797	0.957072	2.2224	1.40439	1.45264	0.937327	1.10403	1.33963	1	0.904165	0.826218	1.18448	0.696508	1.4038	1.39402	1.17478	1.29821	0.925563	1.33748	0.829199	0.58696	1.41094	0.969658	0.902061	0.693368	0.805679	1.30575	0.556184	1.03974	1.10855	3.06658	0.683396	0.952982	0.886283	1.6343	1.03311	1.22587
DN-DIAN-11841	1.29311	3.05827	1	1.25337	0.904694	1.10645	1.32155	1.08213	0.735695	1.11112	1.25312	0.550833	1	0.903786	1.41505	1.13867	0.821256	1.29951	1.3438	1.33501	1.00128	0.911419	0.746727	1.08329	1.12248	1.34417	1.30341	1.38872	1.36189	0.834908	1.38004	1.13557	0.048596	0.814379	1.19861	0.842115	0.369675	0.671995	1.21692	1.27445	0.918693	1.11773	2.65267	0.883333	0.842685	1.09576	0.953621	0.738596	0.963918
DN-DIAN-11842	1.2564	1.19836	0.117282	0.754991	0.621873	1.26329	2.4173	0.971879	0.852238	0.657386	2.55353	0.356538	1.11492	1.66376	1.31142	0.829573	0.796809	0.274969	0.823887	1.94823	0.929401	1.03797	0.749561	1.10694	4.79256	1.30278	1.27674	1.31862	1.67811	0.816355	1.71109	1.41457	0.048596	1.1127	1.43422	0.786091	0.369675	0.888247	1.387	1.48143	1.28678	1.25906	2.19947	0.886647	0.637434	1.11062	2.40223	0.709363	0.49227
DN-DIAN-11843	1.14483	0.300828	0.434011	0.322398	0.952568	2.11213	1.60094	0.855449	0.360245	1.33211	12.4749	2.4476	0.893198	1.25354	0.661134	0.741258	1.21272	0.479628	0.3577	1.35227	0.745749	0.954485	1.04882	0.66133	0.814546	0.795912	1.62061	0.85228	1.42698	1.33837	1.20284	1.0755	0.442441	1.10349	1.01988	0.663143	0.369675	1.12958	0.726442	0.937553	1.27706	1.15022	1.69242	0.9284	1.04055	1.58705	1.98253	0.945753	1.02098
DN-DIAN-11844	0.96925	0.512411	1.47322	0.891469	0.601079	1.36414	0.973339	0.757802	0.556493	1.1816	0.951129	0.400207	0.819979	0.267378	2.17792	0.266176	0.664855	1.53282	0.805902	1.19302	0.668106	0.915264	0.781772	0.827021	0.652942	0.723607	1.36158	0.331828	1.06668	1.06997	1.10885	0.817714	0.048596	0.74365	1.00131	0.217033	0.369675	0.874625	0.772415	1.03435	1.03909	0.968833	1.48356	1.14691	1.05965	0.644427	1.44592	1.00053	0.714786
DN-DIAN-11845	1.02896	0.193113	1.24004	0.543102	1.33075	1.3806	1.16507	0.789871	0.658423	0.942698	0.913407	1.35891	0.896892	1.93579	0.780294	0.521199	0.97357	1.73006	0.630219	1.02725	0.77908	0.84149	0.65842	0.941798	1.03205	1.01787	1.3071	0.579047	1.19596	1.05177	1.12672	1.17561	0.048596	0.657263	0.683433	0.384628	0.369675	1.00742	0.712083	0.137363	0.999865	0.991642	1	0.82222	0.984866	0.776219	1.69499	0.958695	1.10299
DN-DIAN-11846	1.1237	0.224109	2.29603	0.899724	1.02804	1.36482	1.29405	0.822833	0.360245	0.934391	2.14611	1.092	1.26255	1.82422	1.18869	0.786405	1.01803	2.00779	0.790242	1.38733	0.977939	0.949155	0.739573	0.827532	1.45194	1.18825	1.36493	0.952856	1.40819	1.03585	1.41381	1.12448	0.048596	0.74594	0.765883	0.370684	0.369675	1.166	0.78963	0.601055	1.3038	1.14132	0.973129	1.51163	0.593781	0.904479	2.09415	0.777804	1.16694
DN-DIAN-11847	0.902249	0.288538	0.286779	0.757801	0.709856	1.28331	1.48308	0.825258	0.360245	1.23932	2.21283	2.75573	0.891016	2.12174	1	1.11066	1.58218	0.457161	0.654998	1.09051	0.935892	0.801479	0.928534	0.732719	1.06029	0.940945	1.00948	1.09694	1.20567	1.18003	0.975036	1.07572	0.780998	0.901674	0.717083	0.889879	0.788578	1	0.718025	0.137363	1.19163	1.00192	0.983394	1.27862	0.58475	0.826048	1.49979	0.686495	1.20715
DN-DIAN-11848	1.80541	0.872378	0.138193	0.574957	0.538733	0.824915	0.845198	1.52792	0.929879	1.178	4.07188	0.70249	0.891824	1.01056	0.631677	0.281272	1.17775	4.57561	0.550257	1.19594	1.32606	1.03049	0.925812	1.09039	1.55522	1.28525	1.79188	0.586913	1.65762	0.89613	1.12532	1.36019	0.048596	0.668697	0.913475	0.352156	1	1.21462	1.41713	1.3369	1.2711	1.16597	0.528748	1.13913	1.29716	3.58093	0.927294	1.27984	0.49227
DN-DIAN-11849	0.823907	1.48113	0.421795	3.7169	0.576023	0.673264	2.04675	1.50481	1.41089	1	0.314232	2.02054	1.08989	1.30557	3.26505	1.36906	2.89571	2.9756	1.97565	0.759648	1.63946	0.930783	0.98319	1.07866	1.41104	1.44463	1.8315	1.23025	1.14608	0.568747	0.786397	0.566375	0.048596	0.857278	0.875121	5.5054	0.369675	1.29326	0.943362	4.89252	1.30061	1.02716	0.522304	1.01829	0.484374	0.363908	0.917274	0.951492	0.786208
DN-DIAN-11850	0.502826	1.69052	0.838829	1.9722	0.679469	0.709447	0.199911	1.59942	0.867184	1.67815	0.944638	0.821595	0.797522	0.894558	1.82516	1.60084	2.41461	1.93617	4.10153	0.78698	1.24249	0.81207	1.07731	1.00329	1.30865	1.30497	1.40716	1.79288	0.907395	0.570583	0.836715	0.674797	0.605732	0.689663	0.910861	16.7374	0.369675	1.41608	0.81031	1.30431	1.5146	1.00657	0.824119	1.31632	1	0.759317	1.88149	1.06004	0.664995
DN-DIAN-11851	1.39331	1.59626	0.703491	1.47369	0.603507	0.485724	1.72769	1.14333	0.360245	1.39459	0.378561	0.422282	0.774987	0.912931	1.24883	0.855683	1.92119	1.92812	3.45915	0.727609	1.21729	0.772718	0.69022	1.04556	1.18951	0.935217	1.25831	0.972976	1.03439	0.501299	0.801071	0.752728	1.5691	0.707546	0.886332	4.01243	0.369675	1.17838	0.776243	1.06547	1.01911	0.937099	0.569979	1.24639	0.593095	1.28092	1.85348	0.842615	0.49227
DN-DIAN-11852	1.38902	1.88592	0.0732753	1.20569	0.626696	0.379181	0.927218	0.937074	0.904281	1.51882	0.397546	0.503309	1.05739	0.581819	1.0658	0.525152	1.23509	1.20125	2.64543	0.858493	1.71426	0.783811	0.884547	0.890114	0.982029	1.0149	1.59133	0.665833	1.25052	0.718717	0.778452	0.936842	0.828017	0.953567	0.889835	0.588267	0.369675	1.44743	1.03036	3.38292	1.26915	1.09837	1.5329	1.28642	0.805883	1.75343	1.02674	0.948607	0.595057
DN-DIAN-11853	1.05348	0.507183	0.0515704	2.27432	0.516153	1.13641	0.97705	1.06174	0.887732	0.566101	1.44691	0.418789	1.10342	0.67687	1.28052	0.292277	0.788478	0.375558	0.228399	0.948499	0.597373	0.944349	0.59919	0.739654	0.907335	1.00528	1.60712	0.342771	1.75532	0.824349	0.882434	1.28245	0.850958	0.603311	0.895788	0.285032	0.369675	0.876237	1.31323	0.137363	0.754523	1.15488	1.4067	1.16301	0.489957	0.848293	0.862687	0.690663	0.812528
DN-DIAN-11854	0.626272	0.908852	1.0255	1.10824	0.639399	0.604325	0.619728	1.01332	0.360245	0.74774	0.48302	1.12003	0.629242	0.44241	1.03041	1.321	1.46193	1.304	0.766442	1.00008	0.85841	0.877969	0.975656	1.12905	0.559036	1.00689	1.22388	0.899514	1.01997	0.833349	0.940675	0.376932	0.862511	0.350666	0.886877	1.07372	1.15069	0.858933	1.05943	1.40962	0.985618	1.17674	1.23067	0.939803	1.17189	0.810278	1.07584	1.0167	0.638705
DN-DIAN-11855	0.653516	0.72688	1.51479	1.85297	0.813621	0.965626	1.08127	1.05372	1.02377	1.08065	0.492854	0.356538	1.00726	1.37406	1.34847	1.62155	1.41554	1.71699	1.31482	1.05623	1.18903	1.09277	0.933425	0.750835	0.534803	0.918797	1.47058	0.786927	0.842865	1.08647	1.83927	0.96391	0.440999	0.555985	0.814382	0.608859	0.369675	0.821535	0.89151	0.384146	0.85799	1.24815	1.38602	1.22711	1.4276	0.0857356	1.87944	1.06461	1.10296
DN-DIAN-11856	0.752974	1.07776	1.88857	1.1862	0.529228	0.800986	0.515699	0.864709	0.760721	1.29081	0.897618	0.356538	0.627754	0.890805	1.18046	1.37746	1.34352	0.923248	1.04834	1.13724	1.04275	0.852744	0.853349	0.809014	1.29258	1.09873	1.54207	0.860804	0.929362	0.801295	0.805469	0.551133	1.26073	0.407956	0.768663	0.818218	0.691738	0.789577	1.10598	0.137363	0.741705	1.14861	1.18409	1.35696	1.06386	0.0857356	1	0.878851	0.820183
DN-DIAN-11857	1.58725	1.47354	1.20872	1.17666	0.567103	0.71688	1.0714	1.01998	0.360245	1.46052	0.282109	0.356538	0.723591	0.899116	1.07987	1.25108	1.28939	1.3796	1.50997	1.11228	1.02147	1.02088	0.871662	0.805043	1.60468	1.36378	1.34823	1.05695	1.29041	0.719498	0.938852	0.784084	0.827233	0.459822	0.867409	0.728106	0.864549	0.942779	1.13972	0.137363	0.791655	1.27223	1.20222	1.50136	0.656658	0.523927	0.907257	0.372483	0.887659
DN-DIAN-11858	1.08461	0.814049	0.558397	0.577817	0.596279	0.979838	0.797428	0.887965	0.360245	2.20354	14.7785	0.356538	0.727742	0.174016	0.774298	0.60463	0.75077	0.411312	0.503031	1.01662	0.954447	0.816009	1.1379	0.97141	1.05696	0.867745	1.40403	0.522784	1.15998	0.871429	0.734729	0.708054	0.941564	2.2396	1.09443	0.454884	0.369675	1.0363	1.45609	0.57287	1.03934	1.05024	1.41867	1.22106	0.876817	0.0857356	1.32644	0.728664	0.680069
DN-DIAN-11859	1.26191	0.953958	1.54426	0.215348	0.558162	0.932529	0.654377	1.16516	0.360245	0.666541	3.11814	0.719381	0.700616	0.135793	0.518931	0.235523	0.733017	1.96945	1.07495	1.05826	1.18104	0.827302	0.802713	0.904763	0.338923	0.889276	1.96356	0.543989	1.14308	0.685927	0.872756	1.01488	0.967359	2.66424	0.903918	0.226352	0.369675	0.858803	1.01591	0.137363	0.748609	1.26117	1.61622	0.809326	0.427565	0.0857356	0.776475	0.720703	1.057
DN-DIAN-11860	1.10032	0.750239	0.978384	0.215348	0.570085	0.823368	0.968767	1.09292	0.360245	0.685179	1.08499	1.51199	0.64405	0.575705	1.18973	0.213196	0.713145	1.25349	1.23962	0.777275	1.03359	0.864038	0.808316	0.804336	0.368153	1.08217	1.419	0.333376	1	0.630435	0.812526	0.992775	1.08	1.76629	0.683999	0.289367	0.369675	0.895821	0.958475	0.137363	0.62868	1.03514	1.16694	1.28283	0.689687	0.845673	1.10784	0.746137	0.92567
DN-DIAN-11861	1.89605	1.01909	0.244919	0.215348	0.612266	0.968957	1.07636	1.02522	0.360245	0.612383	0.798662	0.356538	0.985957	1.01166	1.05672	0.477401	0.82309	0.459337	0.918629	0.930677	0.923494	0.863761	0.602719	0.96243	0.554075	1.47641	1.64406	0.579276	1.34677	0.821429	0.738809	0.983275	1.99152	1.80612	0.721224	0.477049	1.12547	1.01826	1.22987	0.137363	0.627637	1.08024	1.00588	1.56467	0.294709	0.704282	1.36954	0.659497	0.96101
DN-DIAN-11862	1.8665	1.67449	0.177235	1.27761	0.470128	1.2255	0.913472	0.751267	0.759855	0.768728	0.910311	0.611588	1.04422	1.60167	1.84748	1.41617	1.02929	0.589252	1.44903	1.23351	1.26575	1.07212	0.872802	0.967966	0.835324	1.23278	1.59544	1.24694	1.46496	0.79065	0.957073	0.77671	0.790239	1.96066	0.823694	2.17628	0.834914	1.12508	1.26757	0.661262	1.00824	1.31672	0.879928	1.16512	0.562978	1.40546	1.01387	0.744291	0.874959
DN-DIAN-11863	1.01005	0.489454	0.365227	0.367971	0.886265	1.70414	2.36819	1	0.360245	1.02615	15.8988	1.06672	1.3442	1.30411	0.539404	1.0089	1.03828	0.60685	0.57163	1.12042	1.02439	0.861195	0.716273	0.66501	0.535369	0.947397	1.32846	1.01365	0.916838	1.24306	0.750767	1.21994	1.34511	0.957002	0.791667	1.19294	0.584899	0.835719	0.807554	1.08566	1.19549	0.859329	1.14599	1.22603	0.76903	0.727873	0.777439	0.830324	0.846028
DN-DIAN-11864	0.710792	0.788413	1.30245	0.689146	0.784362	0.998133	0.981608	0.999031	0.742384	0.440184	0.212622	1.51385	1.29342	0.911343	0.828319	1	0.984703	2.00824	1.72251	0.719964	1.17138	0.824857	0.52182	0.770996	0.120093	1.06009	1.61911	0.852431	0.422614	1.12837	0.553716	1.33579	1.14375	0.573563	0.734023	2.19489	0.369675	0.657505	0.830275	0.670987	0.819815	0.916255	1.00456	0.957701	0.792975	0.38633	0.784187	1.01479	0.7579
DN-DIAN-11865	1.08255	1.12668	1.46093	1.09964	0.779022	0.869497	0.780333	1.00129	0.510845	0.543991	0.448063	1.07201	1.04038	0.780951	0.952405	1.0504	1.11462	1.03935	1	0.905609	1.14857	0.892394	0.469332	1.02651	0.359076	1.05714	1.05815	1.35638	0.753129	0.730008	0.672173	1.05081	0.048596	0.447148	0.620177	1.77933	0.369675	0.709376	0.865166	0.293753	0.479979	1.02803	0.745493	0.686789	0.525511	0.511701	0.516131	0.774813	0.79876
DN-DIAN-11866	0.930308	0.803607	1.0426	0.423575	0.676493	1.35143	0.94324	0.935515	0.360245	0.657336	0.212622	0.356538	1.16626	0.826703	0.913986	0.852616	0.99764	1	1.48884	0.875766	1.14822	0.835852	0.36222	1.02438	0.338951	1.43846	1.25074	0.937319	0.578452	0.672631	0.76483	1.49067	0.566606	0.71576	0.661266	0.857716	0.369675	0.660235	0.952637	0.821074	0.702024	1.03702	0.953518	1.03805	0.417921	0.662933	0.669512	0.611683	0.954126
DN-DIAN-11867	0.780776	0.78837	1.99961	0.705845	0.640851	1	1.06053	0.837711	1.58631	0.626768	0.558229	1.18641	1.10717	1.14394	1.14556	0.870372	1.20077	1.12508	0.945633	0.645456	1.05357	0.810554	0.568846	0.864905	0.362659	0.883837	1.34276	1.20653	0.687068	0.609521	0.692756	0.96827	0.048596	0.971413	0.62614	0.667054	0.369675	0.713893	0.795244	0.51123	0.487946	0.824665	0.77368	0.722916	0.471157	0.507961	0.873504	0.372483	0.755081
DN-DIAN-11868	0.334785	0.151767	0.487651	0.948498	1.13911	1.99413	1.46845	0.824453	0.360245	1.65383	2.71259	0.356538	0.733984	0.771964	1.16544	0.836359	1.08131	0.246661	0.214597	0.597119	0.496533	0.624956	0.979154	0.675775	1.46404	0.544589	0.954179	1.08577	0.385011	1.38569	0.898011	0.937895	0.048596	1.12971	1.06966	1.53618	0.388041	0.653562	0.634408	0.457313	1.01093	0.842418	1.65449	0.651038	1.98562	2.45369	0.433256	1.49374	0.49227
DN-DIAN-11869	0.334785	0.915384	0.33607	0.215348	0.888255	0.736478	1.3552	0.886388	0.360245	3.4766	1.43033	0.673282	0.624286	0.224956	0.689287	0.770167	0.904782	0.243762	0.155337	0.939482	0.742978	0.682774	1.32039	0.766915	4.72311	0.36132	1.13585	0.613759	0.79371	1.20938	0.971812	0.993004	0.799555	0.571629	1.15134	1.63133	0.369675	0.715909	0.883299	0.458483	0.788811	0.966487	1.76872	0.782851	1.93155	0.683333	1.00091	1.51226	0.49227
DN-DIAN-11870	0.64867	0.792378	0.0730624	0.550236	0.767056	0.805787	2.88101	1.70571	1.13447	1.15497	0.680722	1.90355	1.08755	1.68374	0.62176	0.542192	1.12617	0.285373	0.398929	0.809257	0.608651	1.16553	1.26764	0.535553	1.50563	1.10837	1.17361	0.800184	0.767546	1.3427	1.13799	0.775649	0.048596	1.2536	1.61389	0.819127	0.728055	1.11072	0.703497	0.137363	0.108084	1.00888	3.10549	0.737037	2.01803	2.36415	1.47789	1.42775	0.770986
DN-DIAN-11871	0.942489	1.48471	0.416073	0.854908	0.873994	0.618127	0.956575	1.12741	0.647402	2.27879	1.17132	0.356538	0.755547	0.230152	0.84256	0.481381	1.05236	0.242008	0.29978	0.810038	0.64238	0.937669	1.47171	0.674823	3.44314	0.505148	1.16043	0.675198	0.407219	1.30653	0.862745	0.815006	1.33695	1.28901	1.58968	0.45536	0.369675	1.03991	0.902948	1.91594	1.02052	0.9703	3.06479	0.476596	2.48863	1.04377	0.710528	2.14914	0.901932
DN-DIAN-11872	1.15304	0.722788	0.556443	0.819915	0.861667	0.468714	0.82815	0.950159	1.02998	1.70023	0.724585	0.42337	0.894593	0.0437965	0.76392	0.595799	1.05992	0.29504	0.350095	0.617323	0.725244	0.813461	1.44378	0.773921	2.45836	0.708195	1.1626	0.743614	1.21488	1.15025	0.702272	0.952867	0.260587	0.779252	1.28017	0.388435	0.774187	0.974196	0.838219	1.02439	0.961177	0.885423	1.59127	0.631863	2.78971	2.85433	0.614259	2.17143	0.577698
DN-DIAN-11873	0.334785	0.533684	0.39753	0.215348	1.02624	0.974882	0.873335	0.837653	1.06426	1.12054	6.00998	0.784385	0.646593	0.0382459	0.406794	0.663452	1.03828	0.221567	0.279496	0.615596	0.714277	0.775079	0.81335	0.64514	0.91321	0.523704	0.836813	0.631435	0.795125	0.886645	0.804982	0.642404	0.672609	0.743766	1.17926	0.538459	0.369675	0.7383	0.577729	0.137363	0.631064	0.756135	1.16983	1.44116	1.71656	1.85836	1.20958	1.22268	0.49227
[truncated: 846 more columns]

## Sheet: chemical anotation
CHEM_ID	SUPER_PATHWAY	SUB_PATHWAY	CHEMICAL_NAME	CAS	CHEMSPIDER	HMDB	KEGG	PUBCHEM
35	Amino Acid	Glutamate Metabolism	S-1-pyrroline-5-carboxylate	2906-39-0	10140206	HMDB0001301	C04322	11966181
50	Amino Acid	Polyamine Metabolism	spermidine	124-20-9	1071	HMDB0001257	C00315	1102
55	Cofactors and Vitamins	Nicotinate and Nicotinamide Metabolism	1-methylnicotinamide	1005-24-9	8305504	HMDB0000699	C02918	457
62	Lipid	Fatty Acid, Dihydroxy	12,13-DiHOME	263399-35-5	8412123	HMDB0004705	C14829	10236635
93	Energy	TCA Cycle	alpha-ketoglutarate	328-50-7,22202-68-2,305-72-6	50	HMDB0000208	C00026	51
98	Amino Acid	Tryptophan Metabolism	kynurenate	492-27-3	3712	HMDB0000715	C01717	3845
111	Amino Acid	Leucine, Isoleucine and Valine Metabolism	3-hydroxyisobutyrate	2068-83-9	10140307	HMDB0000023,HMDB0000336	C01188,C06001	11966314
112	Lipid	Mevalonate Metabolism	3-hydroxy-3-methylglutarate	503-49-1	4573695	HMDB0000355	C03761	1662,5459993
117	Amino Acid	Tyrosine Metabolism	homovanillate (HVA)	306-08-1	5323114	HMDB0000118	C05582	1738
132	Carbohydrate	Glycolysis, Gluconeogenesis, and Pyruvate Metabolism	3-phosphoglycerate	80731-10-8	10669764	HMDB0000807	C00597	724
136	Lipid	Primary Bile Acid Metabolism	cholate	81-25-4		HMDB0000619	C00695	221493
144	Amino Acid	Phenylalanine Metabolism	4-hydroxyphenylacetate	156-38-7	3881560	HMDB0000020	C00642	127
158	Nucleotide	Pyrimidine Metabolism, Thymine containing	5,6-dihydrothymine	696-04-8	84456	HMDB0000079	C00906	93556
171	Nucleotide	Purine Metabolism, (Hypo)Xanthine/Inosine containing	hypoxanthine	68-94-0	768	HMDB0000157	C00262	790,135398638
179	Lipid	Fatty Acid, Dihydroxy	9,10-DiHOME	263399-34-4	8142232	HMDB0004704	C14828	9966640
180	Lipid	Long Chain Polyunsaturated Fatty Acid (n3 and n6)	linoleate (18:2n6)	60-33-3	4444105	HMDB0006270,HMDB0000673	C01595	5280450
181	Lipid	Medium Chain Fatty Acid	laurate (12:0)	143-07-7	3756	HMDB0000638	C02679	3893
182	Cofactors and Vitamins	Nicotinate and Nicotinamide Metabolism	quinolinate	89-00-9	1037	HMDB0000232	C03722	1066
187	Amino Acid	Polyamine Metabolism	N('1)-acetylspermidine	14278-49-0	482	HMDB0001276	C00612	496
189	Amino Acid	Lysine Metabolism	N6,N6,N6-trimethyllysine	23284-33-5	140379	HMDB0001325	C03793	440120
192	Amino Acid	Polyamine Metabolism	N-acetylputrescine	18233-70-0	109095	HMDB0002064	C02714	122356
194	Amino Acid	Methionine, Cysteine, SAM and Taurine Metabolism	N-formylmethionine	4289-98-9	388809	HMDB0001015	C03145	439750
197	Amino Acid	Methionine, Cysteine, SAM and Taurine Metabolism	S-adenosylhomocysteine (SAH)	979-92-0	16788012	HMDB00939	C00021	439155
207	Nucleotide	Purine Metabolism, Adenine containing	adenosine 3',5'-cyclic monophosphate (cAMP)	60-92-4	268	HMDB0000058	C00575	6076
209	Nucleotide	Purine Metabolism, Adenine containing	adenosine 5'-monophosphate (AMP)	149022-20-8	10239183	HMDB0000045	C00020	6083
212	Amino Acid	Polyamine Metabolism	5-methylthioadenosine (MTA)	2457-80-9	388321	HMDB0001173	C00170	439176
213	Nucleotide	Purine Metabolism, Adenine containing	N6-methyladenosine	1867-73-8	92307	HMDB0004044		102175
229	Lipid	Long Chain Polyunsaturated Fatty Acid (n3 and n6)	arachidonate (20:4n6)	506-32-1	392692	HMDB0001043	C00219	444899
231	Amino Acid	Urea cycle; Arginine and Proline Metabolism	arginine	1119-34-2	227	HMDB0000517	C00062	6322
234	Amino Acid	Alanine and Aspartate Metabolism	aspartate	56-84-8	5745	HMDB0000191	C00049	5960
240	Amino Acid	Tyrosine Metabolism	3-(4-hydroxyphenyl)lactate	6482-98-0	9010	HMDB0000755	C03672	9378
241	Amino Acid	Phenylalanine Metabolism	phenylpyruvate	156-06-9	972	HMDB0000205	C00166	997
244	Nucleotide	Pyrimidine Metabolism, Uracil containing	beta-alanine	107-95-9,56-41-7	234	HMDB0000056	C00099	239
250	Cofactors and Vitamins	Hemoglobin and Porphyrin Metabolism	biliverdin	55482-27-4,55482-27-4	10628548	HMDB0001008	C00500	5280353
252	Energy	TCA Cycle	succinate	110-15-6	1078	HMDB0000254	C00042	1110
254	Lipid	Ketone Bodies	3-hydroxybutyrate (BHBA)	625-72-9	428	HMDB0000442,HMDB0000357,HMDB0000011	C03197,C01089	94318,441,92135
264	Lipid	Sterol	7-dehydrocholesterol	434-16-2	388534	HMDB0000032	C01164	439423
266	Lipid	Sterol	cholesterol	57-88-5	4937803	HMDB0000067	C00187	5997,6432564,11025495
267	Lipid	Phospholipid Metabolism	choline phosphate	72556-74-2	119298	HMDB0001565	C00588	1014
272	Lipid	Corticosteroids	corticosterone	50-22-6	5550	HMDB0001547	C02140	5753
273	Lipid	Corticosteroids	cortisone	53-06-5	361685	HMDB0002802	C00762	222786
275	Amino Acid	Creatine Metabolism	creatinine	60-27-5	568	HMDB0000562	C00791	588
278	Amino Acid	Glutathione Metabolism	cysteinylglycine	19246-18-5	58762	HMDB0000078	C01419	439498
279	Amino Acid	Methionine, Cysteine, SAM and Taurine Metabolism	cystine	56-89-3	575	HMDB0000192	C00491	67678
297	Lipid	Sphingosines	sphingosine	123-78-4	4510275	HMDB0000252	C00319	5280335
302	Lipid	Secondary Bile Acid Metabolism	deoxycholate	83-44-3	389318	HMDB0000626	C04483	222528,440355
310	Amino Acid	Methionine, Cysteine, SAM and Taurine Metabolism	cystathionine	535-34-2	811	HMDB0000099	C02291	439258
313	Lipid	Sphingolipid Synthesis	sphinganine	3102-56-5	3014	HMDB0000269	C00836	3126
327	Cofactors and Vitamins	Riboflavin Metabolism	flavin adenine dinucleotide (FAD)	146-14-5,84366-81-4	559059	HMDB0001248	C00016	643975
330	Energy	TCA Cycle	fumarate	100-17-8	10197150	HMDB0000134	C00122	444972
331	Peptide	Gamma-glutamyl Amino Acid	gamma-glutamylglutamate	1116-22-9	83831	HMDB0011737	C05282	92865
338	Xenobiotics	Food Component/Plant	gluconate	527-07-1	10240	HMDB0000625	C00257	10690,3085666
339	Lipid	Fatty Acid, Dicarboxylate	glutarate (C5-DC)	110-94-1	3618533	HMDB0000661	C00489	743,4418048
340	Amino Acid	Glycine, Serine and Threonine Metabolism	glycine	56-40-6	730	HMDB0000123	C00037	750
342	Lipid	Primary Bile Acid Metabolism	glycocholate	475-31-0,863-57-0	9734	HMDB0000138	C01921	10140
344	Amino Acid	Creatine Metabolism	guanidinoacetate	352-97-6	743	HMDB0000128	C00581	763
355	Amino Acid	Histidine Metabolism	histidine	5934-29-2	752	HMDB0000177	C00135	6274
356	Lipid	Corticosteroids	cortisol	50-23-7		HMDB0000063	C00735	5754
358	Amino Acid	Methionine, Cysteine, SAM and Taurine Metabolism	hypotaurine	300-84-5	96959	HMDB0000965	C00519	107812
361	Nucleotide	Purine Metabolism, (Hypo)Xanthine/Inosine containing	inosine	58-63-9	21241953	HMDB0000195	C00294	6021
363	Lipid	Inositol Metabolism	myo-inositol	87-89-8	10239179	HMDB0000211	C00137	892
376	Amino Acid	Leucine, Isoleucine and Valine Metabolism	isoleucine	73-32-5	769	HMDB0000172	C06418,C00407,C16424	6306
381	Amino Acid	Lysine Metabolism	2-aminoadipate	1118-90-7,542-32-5	456	HMDB0000510	C00956	92136
391	Amino Acid	Urea cycle; Arginine and Proline Metabolism	citrulline	372-75-8	810	HMDB0000904	C00327	9750
397	Amino Acid	Leucine, Isoleucine and Valine Metabolism	leucine	61-90-5		HMDB0000687	C00123	6106
407	Amino Acid	Lysine Metabolism	lysine	56-87-1	5747	HMDB0003405	C00739,C00047	5962
409	Energy	TCA Cycle	malate	6915-15-7	510	HMDB0031518,HMDB0000156,HMDB0000744	C00149,C00711,C00497	525
415	Amino Acid	Methionine, Cysteine, SAM and Taurine Metabolism	methionine	63-68-3	5907	HMDB0000696	C00073	6137
418	Lipid	Fatty Acid Metabolism (also BCAA Metabolism)	methylmalonate (MMA)	516-05-2	473	HMDB0000202	C02170	487
424	Lipid	Long Chain Saturated Fatty Acid	palmitate (16:0)	57-10-3	960	HMDB0000220	C00249	985
432	Cofactors and Vitamins	Nicotinate and Nicotinamide Metabolism	nicotinamide	98-92-0	911	HMDB0001406	C00153	936
437	Lipid	Medium Chain Fatty Acid	pelargonate (9:0)	112-05-0	4574394	HMDB0000847	C01601	8158
439	Lipid	Long Chain Saturated Fatty Acid	stearate (18:0)	57-11-4	5091	HMDB0000827	C01530	5281
444	Amino Acid	Urea cycle; Arginine and Proline Metabolism	ornithine	3184-13-2	6026	HMDB0000214	C00077	6262
445	Nucleotide	Pyrimidine Metabolism, Orotate containing	orotate	50887-69-9	942	HMDB0000226	C00295	967
452	Lipid	Long Chain Monounsaturated Fatty Acid	palmitoleate (16:1n7)	373-49-9	393216	HMDB0003229	C08362	445638
460	Amino Acid	Phenylalanine Metabolism	phenylalanine	63-91-2	5910	HMDB0000159	C00079	6140
461	Energy	Oxidative Phosphorylation	phosphate	7664-38-2	1032	HMDB0001429	C00009	1061
466	Xenobiotics	Food Component/Plant	phytanate	14721-66-5	10140204	HMDB0000801	C01607	26840
480	Amino Acid	Urea cycle; Arginine and Proline Metabolism	proline	147-85-3	128566	HMDB0000162,HMDB0003411	C00148,C000763	8988,145742,614
482	Carbohydrate	Glycolysis, Gluconeogenesis, and Pyruvate Metabolism	lactate	79-33-4	592	HMDB0000190	C00186	612
491	Cofactors and Vitamins	Vitamin B6 Metabolism	pyridoxal	65-22-5	1021	HMDB0001545	C00250	1050
498	Cofactors and Vitamins	Vitamin A Metabolism	retinol (Vitamin A)	68-26-8	393012	HMDB0000305	C00473	445354
501	Xenobiotics	Drug - Topical Agents	salicylate	69-72-7	331	HMDB0001895	C00805	338
503	Amino Acid	Glycine, Serine and Threonine Metabolism	serine	56-45-1	5736	HMDB0000187	C00065	5951
504	Amino Acid	Tryptophan Metabolism	serotonin	153-98-0	5013	HMDB0000259	C00780	5202
512	Amino Acid	Methionine, Cysteine, SAM and Taurine Metabolism	taurine	107-35-7	1091	HMDB0000251	C00245	1123
519	Lipid	Long Chain Saturated Fatty Acid	myristate (14:0)	544-63-8	10539	HMDB0000806	C06424	11005
533	Amino Acid	Urea cycle; Arginine and Proline Metabolism	urea	57-13-6	1143	HMDB0000294	C00086	1176
535	Nucleotide	Pyrimidine Metabolism, Uracil containing	uridine	58-96-8	5807	HMDB0000296	C00299	6029
536	Nucleotide	Pyrimidine Metabolism, Uracil containing	2'-deoxyuridine	951-78-0	13118	HMDB0000012	C00526	13712
561	Amino Acid	Glutamate Metabolism	glutamate	56-86-0	591	HMDB0000148	C00025,C00217	33032
563	Amino Acid	Glutamate Metabolism	glutamine	56-85-9	5746	HMDB0000641	C00064	5961
564	Amino Acid	Glycine, Serine and Threonine Metabolism	threonine	72-19-5	6051	HMDB0000167	C00188	6288
565	Amino Acid	Tryptophan Metabolism	tryptophan	73-22-3	6066	HMDB0000929	C00078	6305
566	Amino Acid	Leucine, Isoleucine and Valine Metabolism	valine	72-18-4	6050	HMDB0000883	C00183	6287
572	Carbohydrate	Glycolysis, Gluconeogenesis, and Pyruvate Metabolism	glucose	50-99-7	71358	HMDB0000122	C00031	5793
796	Amino Acid	Methionine, Cysteine, SAM and Taurine Metabolism	alpha-ketobutyrate	600-18-0	2829426	HMDB0000005	C00109	58
799	Amino Acid	Glycine, Serine and Threonine Metabolism	betaine	107-43-7	19951173,242	HMDB0000043	C00719	247
800	Amino Acid	Methionine, Cysteine, SAM and Taurine Metabolism	cysteine	56-89-3,52-90-4	5653	HMDB0000574	C00097	5862
803	Carbohydrate	Fructose, Mannose and Galactose Metabolism	mannose	3458-28-4	141983	HMDB0000169	C00159,C02209,C00936	82308,439680,185698,18950
806	Amino Acid	Glycine, Serine and Threonine Metabolism	dimethylglycine	1118-68-9	653	HMDB0000092	C03626	673
811	Amino Acid	Alanine and Aspartate Metabolism	alanine	56-41-7	5735	HMDB0000161	C00041	5950
815	Amino Acid	Tyrosine Metabolism	tyrosine	60-18-4	5833	HMDB0000158	C00082	6057
821	Nucleotide	Pyrimidine Metabolism, Uracil containing	pseudouridine	1445-07-4	21403010	HMDB0000767	C02067	15047
823	Carbohydrate	Glycolysis, Gluconeogenesis, and Pyruvate Metabolism	pyruvate	127-17-3	96901	HMDB0000243	C00022	1060
825	Nucleotide	Pyrimidine Metabolism, Uracil containing	uracil	66-22-8	1141	HMDB0000300	C00106	1174
827	Nucleotide	Pyrimidine Metabolism, Cytidine containing	cytidine	65-46-3	5940	HMDB0000089	C00475	6175
848	Xenobiotics	Tobacco Metabolite	cotinine	486-56-6	746405	HMDB0001046		408
849	Xenobiotics	Xanthine Metabolism	caffeine	58-08-2	2424	HMDB0001847	C07481	2519
878	Carbohydrate	Fructose, Mannose and Galactose Metabolism	fructose	57-48-7	5764	HMDB0000660	C00095	2723872
880	Nucleotide	Purine Metabolism, Adenine containing	adenine	73-24-5	185	HMDB0000034	C00147	190
888	Lipid	Medium Chain Fatty Acid	caprate (10:0)	334-48-5	2863	HMDB0000511	C01571	2969
891	Lipid	Long Chain Saturated Fatty Acid	margarate (17:0)	506-12-7	10033	HMDB0002259		10465
892	Lipid	Long Chain Saturated Fatty Acid	nonadecanoate (19:0)	646-30-0	12071	HMDB0000772	C16535	12591
893	Lipid	Long Chain Saturated Fatty Acid	arachidate (20:0)	506-30-9	10035	HMDB0002212	C06425	10467
917	Amino Acid	Alanine and Aspartate Metabolism	asparagine	70-47-3	6031	HMDB0000168	C00152	6267
923	Nucleotide	Pyrimidine Metabolism, Orotate containing	dihydroorotate	155-54-4	628	HMDB03349	C00337	648
925	Lipid	Medium Chain Fatty Acid	heptanoate (7:0)	111-14-8	7803	HMDB0000666	C17714	8094
926	Lipid	Medium Chain Fatty Acid	caproate (6:0)	142-62-1	8552	HMDB0000535	C01585	8892
932	Lipid	Medium Chain Fatty Acid	caprylate (8:0)	124-07-2	370	HMDB0000482	C06423	379
980	Lipid	Long Chain Saturated Fatty Acid	pentadecanoate (15:0)	10002-84-2,1002-84-2	13249	HMDB0000826	C16537	13849
1001	Amino Acid	Urea cycle; Arginine and Proline Metabolism	trans-4-hydroxyproline	51-35-4	5605	HMDB0000725	C01157	5810
1002	Nucleotide	Purine Metabolism, (Hypo)Xanthine/Inosine containing	allantoin	97-59-6	199	HMDB0000462	C02348,C01551,C02350	439714,204,439713
1004	Nucleotide	Purine Metabolism, (Hypo)Xanthine/Inosine containing	xanthine	69-89-6	1151	HMDB0000292	C00385	1188
1021	Amino Acid	Glutathione Metabolism	5-oxoproline	98-79-3	7127	HMDB0000267	C02237,C01879	439685,7405
1022	Amino Acid	Tryptophan Metabolism	picolinate	98-98-6	993	HMDB0002243	C10164	1018
1023	Amino Acid	Glycine, Serine and Threonine Metabolism	sarcosine	107-97-1	1057	HMDB0000271	C00213	1088
1024	Cofactors and Vitamins	Pantothenate and CoA Metabolism	pantothenate	137-08-6	6361	HMDB0000210	C00864	6613
1025	Amino Acid	Lysine Metabolism	pipecolate	4043-87-2		HMDB0000070
1026	Lipid	Phospholipid Metabolism	phosphoethanolamine	1071-23-4	990	HMDB0000224	C00346	1015
1052	Carbohydrate	Glycolysis, Gluconeogenesis, and Pyruvate Metabolism	glycerate	600-19-1	732	HMDB0000139,HMDB0006372	C00258	439194,752
1053	Nucleotide	Pyrimidine Metabolism, Uracil containing	3-ureidopropionate	462-88-4	109	HMDB0000026	C02642	111
1082	Amino Acid	Leucine, Isoleucine and Valine Metabolism	N-acetylleucine	1188-21-2	64075	HMDB0011756	C02710	70912
1083	Amino Acid	Methionine, Cysteine, SAM and Taurine Metabolism	N-acetylmethionine	65-82-7	395338	HMDB0011745	C02712	448580
1084	Amino Acid	Leucine, Isoleucine and Valine Metabolism	N-acetylvaline	96-81-1	60154	HMDB0011757		66789
1087	Lipid	Long Chain Monounsaturated Fatty Acid	erucate (22:1n9)	112-86-7	7924	HMDB0002068	C08316	8216,5281116
1090	Cofactors and Vitamins	Hemoglobin and Porphyrin Metabolism	bilirubin (Z,Z)	635-65-4	4444055	HMDB0000054	C00486	5280352
1094	Amino Acid	Tyrosine Metabolism	thyroxine	51-48-9	5614	HMDB0000248	C01829	5819
1102	Peptide	Gamma-glutamyl Amino Acid	gamma-glutamyltyrosine	7432-23-7	85142	HMDB0011741		94340
1105	Cofactors and Vitamins	Tocopherol Metabolism	alpha-tocopherol	10191-41-0,59-02-9	14265	HMDB0001893	C02477	86472
1110	Amino Acid	Alanine and Aspartate Metabolism	N-acetylalanine	97-69-8	79449	HMDB0000766	C02847	88064
1111	Amino Acid	Tyrosine Metabolism	vanillylmandelate (VMA)	55-10-7	1207	HMDB0000291	C05584	1245
1113	Amino Acid	Polyamine Metabolism	4-acetamidobutanoate	3025-96-5	17180	HMDB0003681	C02946	18189
1114	Nucleotide	Pyrimidine Metabolism, Thymine containing	3-aminoisobutyrate	214139-20-5,10569-72-9	58481	HMDB0002166	C05145	64956
1123	Lipid	Primary Bile Acid Metabolism	chenodeoxycholate	474-25-9,474-24-9		HMDB0000518	C02528	10133
1124	Energy	TCA Cycle	citrate	77-92-9	305	HMDB0000094	C00158	311
1125	Nucleotide	Pyrimidine Metabolism, Uracil containing	5,6-dihydrouracil	504-07-4	629	HMDB0000076	C00429	649
1128	Amino Acid	Glutathione Metabolism	2-aminobutyrate	1492-24-6	388757	HMDB0000452	C02356	80283
1134	Nucleotide	Purine Metabolism, (Hypo)Xanthine/Inosine containing	urate	120K5305,69-93-2		HMDB0000289	C00366	1175
1135	Lipid	Secondary Bile Acid Metabolism	ursodeoxycholate	128-13-2	29131	HMDB0000946	C07880	31401
1136	Lipid	Short Chain Fatty Acid	valerate (5:0)	109-52-4	7701	HMDB0000892	C00803	7991
1137	Lipid	Endocannabinoid	oleoyl ethanolamide	111-58-0,11-58-0	4446574	HMDB0002088		5283454
1140	Peptide	Gamma-glutamyl Amino Acid	gamma-glutamylglutamine	10148-81-9	133013	HMDB0011738	C05283	150914
1141	Amino Acid	Tyrosine Metabolism	4-hydroxyphenylpyruvate	156-39-8	954	HMDB0000707	C01179	979
1143	Lipid	Short Chain Fatty Acid	butyrate/isobutyrate (4:0)	109-92-6	259	HMDB0000039	C00246	264
1162	Carbohydrate	Aminosugar Metabolism	N-acetylneuraminate	131-48-6	10292217	HMDB0000230	C00270	439197
1215	Carbohydrate	Aminosugar Metabolism	N-acetylglucosaminylasparagine	2776-93-4	21403014	HMDB0000489	C04540	123826
1218	Lipid	Ketone Bodies	acetoacetate	3483-11-2	94	HMDB0000060	C00164	96
1221	Amino Acid	Creatine Metabolism	creatine	57-00-1	566	HMDB0000064	C00300	586
1224	Amino Acid	Glutathione Metabolism	cys-gly, oxidized	7729-20-6	295316			333293
1230	Lipid	Estrogenic Steroids	estrone 3-sulfate	438-67-5	16740220	HMDB0001425	C02538	3001028
1231	Lipid	Long Chain Polyunsaturated Fatty Acid (n3 and n6)	dihomo-linoleate (20:2n6)	2091-39-6	4944228	HMDB0005060	C16525	6439848
1235	Peptide	Gamma-glutamyl Amino Acid	gamma-glutamylhistidine	37460-15-4	5380197	HMDB0029151		7017195
1239	Lipid	Fatty Acid, Monohydroxy	2-hydroxystearate	629-22-1	62625	HMDB0062549	C03042,C03045	439887,439885,69417
1242	Nucleotide	Purine Metabolism, Adenine containing	N1-methyladenosine	15763-06-1	4573813	HMDB0003331	C02494	27476
1254	Lipid	Glycerolipid Metabolism	glycerol	56-81-5	733	HMDB0000131	C00116	753
1256	Lipid	Phospholipid Metabolism	choline	67-48-1	149278	HMDB0000097	C00114	305
1268	Peptide	Gamma-glutamyl Amino Acid	gamma-glutamylleucine	2566-39-4	133115	HMDB0011171		151023
1342	Amino Acid	Tyrosine Metabolism	3-methoxytyrosine	300-48-1	8948	HMDB0001434		9307
1383	Xenobiotics	Drug - Analgesics, Anesthetics	4-acetamidophenol	103-90-2	1906	HMDB0001859	C06804	1983
1442	Amino Acid	Leucine, Isoleucine and Valine Metabolism	beta-hydroxyisovalerate	625-08-1	62571	HMDB0000754		69362
1489	Lipid	Endocannabinoid	palmitoyl ethanolamide	544-31-0	4509	HMDB0002100	C16512	4671
1506	Lipid	Fatty Acid Metabolism (Acyl Glycine)	N-linoleoylglycine	2764-03-6	4938516			6433346
1518	Lipid	Ceramides	N-palmitoyl-sphingosine (d18:1/16:0)	24696-26-2	4446677	HMDB0004949		5283564
1526	Lipid	Phosphatidylethanolamine (PE)	1-palmitoyl-2-oleoyl-GPE (16:0/18:1)	26662-94-2	4446615	HMDB0005320		5283496
1528	Lipid	Phosphatidylinositol (PI)	1-palmitoyl-2-linoleoyl-GPI (16:0/18:2)		21403024	HMDB0009784		46891795
1537	Lipid	Phosphatidylcholine (PC)	1-palmitoyl-2-linoleoyl-GPC (16:0/18:2)	40811-94-7	4450224	HMDB0007973		5287971
1538	Lipid	Sphingomyelins	stearoyl sphingomyelin (d18:1/18:0)	85187-10-6,85187-10-6	4956085	HMDB0001348	C00550	6453725
1539	Lipid	Phosphatidylcholine (PC)	1-palmitoyl-2-oleoyl-GPC (16:0/18:1)	26853-31-6,26853-31-6	4940699	HMDB0007972	C13875	6436017
1547	Lipid	Ceramides	N-stearoyl-sphingosine (d18:1/18:0)*	104404-17-3	4446678	HMDB0004950		5283565
1628	Lipid	Primary Bile Acid Metabolism	glycochenodeoxycholate	16564-43-5		HMDB0000637	C05466	12544
1629	Lipid	Primary Bile Acid Metabolism	taurochenodeoxycholate	6009-98-9	343282	HMDB0000951	C05465	387316
1648	Lipid	Primary Bile Acid Metabolism	taurocholate	145-42-6		HMDB0000036	C05122	6675,46783527
1668	Lipid	Secondary Bile Acid Metabolism	taurodeoxycholate	207737-97-1	2015539	HMDB0000896	C05463	2733768
1869	Xenobiotics	Benzoate Metabolism	2-hydroxyhippurate (salicylurate)	487-54-7	9835	HMDB0000840	C07588	10253
2029	Lipid	Fatty Acid, Dicarboxylate	azelate (C9-DC)	123-99-9	2179	HMDB0000784	C08261	2266
2048	Xenobiotics	Drug - Analgesics, Anesthetics	3-(N-acetyl-L-cystein-S-yl) acetaminophen	52372-86-8	75765			83967
2049	Xenobiotics	Drug - Analgesics, Anesthetics	4-acetaminophen sulfate	32113-41-0,10066-90-7	75741	HMDB0059911	C06804	83939
2050	Lipid	Long Chain Polyunsaturated Fatty Acid (n3 and n6)	eicosapentaenoate (EPA; 20:5n3)	10-2005-9,10417-94-4	393682	HMDB0001999	C06428	446284
2051	Amino Acid	Leucine, Isoleucine and Valine Metabolism	methylsuccinate	498-21-5	9922	HMDB0001844		10349
2054	Amino Acid	Leucine, Isoleucine and Valine Metabolism	ethylmalonate	601-75-2	11263	HMDB0000622		11756
100000007	Lipid	Carnitine Metabolism	carnitine	461-05-2	10455	HMDB0000062	C00487,C00308	288
100000008	Xenobiotics	Benzoate Metabolism	benzoate	65-85-0	238	HMDB0001870	C00180	243
100000010	Xenobiotics	Benzoate Metabolism	3-phenylpropionate (hydrocinnamate)	501-52-0	10181339	HMDB0000764	C05629	107
100000011	Amino Acid	Phenylalanine Metabolism	phenylacetate	103-82-2	10181341	HMDB0000209	C07086	999
100000014	Xenobiotics	Benzoate Metabolism	hippurate	495-69-2	451	HMDB0000714	C01586	464
100000015	Amino Acid	Tryptophan Metabolism	xanthurenate	59-007	5497	HMDB0000881	C02470	5699
100000016	Lipid	Fatty Acid, Dicarboxylate	suberate (C8-DC)	505-48-6	10025	HMDB0000893	C08278	10457
100000036	Amino Acid	Leucine, Isoleucine and Valine Metabolism	3-methyl-2-oxovalerate	51829-07-3,1460-34-0	46	HMDB0000491	C03465,C06008,C00671	439286,440877
100000039	Amino Acid	Methionine, Cysteine, SAM and Taurine Metabolism	methionine sulfoxide	3226-65-1	139840	HMDB0002005	C02989	158980
100000042	Amino Acid	Histidine Metabolism	3-methylhistidine	368-16-1	58494	HMDB0000479	C01152	64969
100000043	Xenobiotics	Drug - Analgesics, Anesthetics	4-acetamidophenylglucuronide	120595-80-4	3239926	HMDB0010316		4022661,83944
100000054	Amino Acid	Lysine Metabolism	5-hydroxylysine	13204-98-3	1002	HMDB0000450	C16741	3032849
100000096	Amino Acid	Guanidino and Acetamido Metabolism	4-guanidinobutanoate	463-003,463-00-3	486	HMDB0003464	C01035	500
100000257	Carbohydrate	Aminosugar Metabolism	glucuronate	207300-70-7	58552	HMDB0000127	C16245	441478,23677976,94715,65041,444791
100000258	Lipid	Glycerolipid Metabolism	glycerol 3-phosphate	29849-82-9	734	HMDB0000126	C0093	754
100000263	Amino Acid	Histidine Metabolism	imidazole lactate	14403-45-3	389128	HMDB0002320	C05568	793
100000265	Amino Acid	Tryptophan Metabolism	kynurenine	2922-83-0	141580	HMDB0000684	C00328	161166
100000269	Lipid	Phospholipid Metabolism	glycerophosphorylcholine (GPC)	28319-77-9	571409	HMDB0000086	C00670	71920
100000282	Amino Acid	Glutamate Metabolism	N-acetylglutamate	5817-08-3	1266066	HMDB0001138	C00624	70914
100000299	Nucleotide	Purine Metabolism, (Hypo)Xanthine/Inosine containing	xanthosine	146-80-5	58484	HMDB0000299	C01762	64959
100000406	Carbohydrate	Pentose Metabolism	ribitol	488-81-3	10254628	HMDB0002917,HMDB0001851,HMDB0000568,HMDB0000508	C00379,C01904,C00474,C00532	6912
100000436	Lipid	Secondary Bile Acid Metabolism	glycodeoxycholate	360-65-6		HMDB00631	C05464	3035026
100000437	Xenobiotics	Xanthine Metabolism	theophylline	58-55-9	2068	HMDB0001889	C07130	2153
100000442	Xenobiotics	Food Component/Plant	quinate	77-95-2	10246715	HMDB0003072	C00296	6508
100000445	Xenobiotics	Xanthine Metabolism	theobromine	83-67-0	5236	HMDB0002825	C07480	5429
100000447	Amino Acid	Tyrosine Metabolism	gentisate	490-79-9	3350	HMDB0000152	C00628	3469
100000453	Xenobiotics	Xanthine Metabolism	paraxanthine	611-59-6	4525	HMDB0001860	C13747	4687
100000463	Amino Acid	Tryptophan Metabolism	indolelactate	832-97-3	83867	HMDB0000671	C02043	92904
100000467	Amino Acid	Tryptophan Metabolism	3-indoxyl sulfate	2642-37-7	9840	HMDB0000682		10258
100000491	Peptide	Gamma-glutamyl Amino Acid	gamma-glutamylphenylalanine	7432-24-8	99868	HMDB0000594		111299
100000551	Amino Acid	Leucine, Isoleucine and Valine Metabolism	4-methyl-2-oxopentanoate	816-66-0	69	HMDB0000695	C00233	70
100000580	Carbohydrate	Glycolysis, Gluconeogenesis, and Pyruvate Metabolism	1,5-anhydroglucitol (1,5-AG)	154-58-5		HMDB0002712	C07326	64960
100000616	Lipid	Phosphatidylinositol (PI)	1-stearoyl-2-arachidonoyl-GPI (18:0/20:4)	383907-33-3	21403055	HMDB0009815
100000626	Lipid	Sphingosines	sphingosine 1-phosphate	26993-30-6	4446673	HMDB0000277	C06124	5283560
100000639	Lipid	Phosphatidylserine (PS)	1-stearoyl-2-oleoyl-GPS (18:0/18:1)		7826037	HMDB0010163		9547087
100000656	Lipid	Lysophospholipid	1-stearoyl-GPI (18:0)	796963-93-4	21403067	HMDB0240261		71581135,42607495
100000657	Lipid	Phosphatidylcholine (PC)	1,2-dipalmitoyl-GPC (16:0/16:0)	63-89-8	398235	HMDB0000564	D03585	452110
100000665	Lipid	Long Chain Polyunsaturated Fatty Acid (n3 and n6)	docosahexaenoate (DHA; 22:6n3)	6217-54-5	393183	HMDB0002183	C06429	445580
100000672	Lipid	Phosphatidylcholine (PC)	1-myristoyl-2-palmitoyl-GPC (14:0/16:0)	69525-80-0	114798	HMDB0007869		129657
100000673	Xenobiotics	Drug - Antibiotic	ofloxacin	82419-36-1	4422	HMDB0015296	D00453,C07321,DG00616	4583
100000706	Amino Acid	Leucine, Isoleucine and Valine Metabolism	alpha-hydroxyisocaproate	10303-64-7	75520	HMDB0000665,HMDB00746,HMDB0000624	C03264	83697,92779,439960
100000707	Lipid	Fatty Acid, Dicarboxylate	maleate	110-16-7	392248	HMDB0000176	C01384	444266
100000708	Amino Acid	Leucine, Isoleucine and Valine Metabolism	isovalerate (i5:0)	503-74-2	10001	HMDB0000718	C08262	10430
100000711	Xenobiotics	Benzoate Metabolism	4-acetylphenol sulfate		3872009			4684006
100000743	Lipid	Fatty Acid, Monohydroxy	2-hydroxyoctanoate	617-73-2	84994	HMDB0002264		94180,6995013,5312860
100000773	Lipid	Fatty Acid, Monohydroxy	3-hydroxyoctanoate	88930-08-9	24791	HMDB0001954	C20793	26613
100000774	Amino Acid	Phenylalanine Metabolism	phenyllactate (PLA)	828-01-3	3715	HMDB0000779,HMDB0000563	C05607	3848
100000776	Lipid	Fatty Acid Metabolism (Acyl Carnitine, Long Chain Saturated)	palmitoylcarnitine (C16)	6865-14-1	448	HMDB0000222	C02990	461
100000781	Lipid	Fatty Acid Metabolism (Acyl Carnitine, Medium Chain)	hexanoylcarnitine (C6)	6920-35-0	4932273	HMDB0000756		6426853
100000787	Amino Acid	Alanine and Aspartate Metabolism	N-acetylaspartate (NAA)	997-55-7,997-55-7	58576	HMDB0000812	C01042	65065
100000790	Xenobiotics	Drug - Antibiotic	isoniazid	54-85-3	3635	HMDB15086	C07054	3767
100000792	Lipid	Androgenic Steroids	dehydroepiandrosterone sulfate (DHEA-S)	651-48-9	12074	HMDB0001032	C04555	12594
100000802	Lipid	Fatty Acid Metabolism (Acyl Carnitine, Short Chain)	acetylcarnitine (C2)	5080-50-2	5406074	HMDB0000201	C02571	7045767
100000808	Amino Acid	Methionine, Cysteine, SAM and Taurine Metabolism	cysteine s-sulfate	1637-71-4	102939	HMDB0000731	C05824	115015
100000827	Lipid	Monoacylglycerol	1-palmitoylglycerol (16:0)	542-44-9	14201	HMDB0011564		14900
100000840	Xenobiotics	Food Component/Plant	tartronate (hydroxymalonate)	80-69-3	44	HMDB0035227	C02287	45
100000841	Cofactors and Vitamins	Ascorbate and Aldarate Metabolism	oxalate (ethanedioate)	144-62-7	946	HMDB0002329	C00209	971
100000846	Xenobiotics	Food Component/Plant	erythritol	149-32-6	13835932	HMDB0002994	C00503	222285
100000856	Xenobiotics	Chemical	trizma acetate	6850-28-8	73346		C07182	16218782
100000863	Lipid	Fatty Acid, Dicarboxylate	adipate (C6-DC)	124-04-9	191	HMDB0000448	C06104	196
100000882	Lipid	Fatty Acid, Monohydroxy	3-hydroxymyristate	3422-31-9	15252	HMDB0061656		16064
100000900	Xenobiotics	Chemical	iminodiacetate (IDA)	142-73-4	8557	HMDB0011753	C19911	8897
100000924	Lipid	Monoacylglycerol	1-oleoylglycerol (18:1)	111-03-5	4446588	HMDB0011567		5283468
100000936	Amino Acid	Leucine, Isoleucine and Valine Metabolism	3-methyl-2-oxobutyrate	3715-29-5	48	HMDB0000019	C00141	49
100000939	Xenobiotics	Food Component/Plant	1,6-anhydroglucose	498-07-7	9587432	HMDB0000640		2724705
100000956	Lipid	Fatty Acid, Monohydroxy	8-hydroxyoctanoate	764-89-6	63018	HMDB0061914		69820
100000961	Amino Acid	Urea cycle; Arginine and Proline Metabolism	homoarginine	156-86-5	8732	HMDB0000670	C01924	9085
100000963	Amino Acid	Urea cycle; Arginine and Proline Metabolism	homocitrulline	1190-49-4	58582	HMDB0000679	C02427	65072
100000997	Lipid	Fatty Acid, Monohydroxy	3-hydroxydecanoate	5561-87-5	24790	HMDB0002203		26612
100001002	Xenobiotics	Chemical	EDTA	60-00-4	5826	HMDB0015109	C00284	6049
100001006	Amino Acid	Glycine, Serine and Threonine Metabolism	N-acetylglycine	543-24-8	10507	HMDB0000532		10972
100001007	Carbohydrate	Pentose Metabolism	ribonate	5336-08-3	4574162	HMDB0000867	C01685	5460677
100001022	Cofactors and Vitamins	Ascorbate and Aldarate Metabolism	threonate	70753-61-6	133224	HMDB0062620,HMDB0000943	C01620	151152,5460407
100001026	Carbohydrate	Fructose, Mannose and Galactose Metabolism	galactonate	299-28-5	114198	HMDB0000565	C00880,C15930	12310779,128869
100001033	Lipid	Sterol	beta-sitosterol	83-46-5	192962	HMDB0000852	C01753	222284
100001034	Amino Acid	Tryptophan Metabolism	indoleacetate	6505-45-9	780	HMDB0000197	C00954	802
100001040	Lipid	Monoacylglycerol	1-linoleoylglycerol (18:2)	2277-28-3	4446589	HMDB0011568		5283469
100001051	Amino Acid	Histidine Metabolism	1-methylhistidine	332-80-9	83153	HMDB0000001	C01152	92105
100001054	Lipid	Fatty Acid Metabolism (also BCAA Metabolism)	butyrylcarnitine (C4)	25576-40-3	184820	HMDB0002013	C02862	439829
100001055	Amino Acid	Leucine, Isoleucine and Valine Metabolism	isobutyrylcarnitine (C4)	25518-49-4		HMDB0000736		168379
100001064	Lipid	Secondary Bile Acid Metabolism	glycolithocholate	474-74-8	103116	HMDB00698	C15557	115245
100001073	Lipid	Androgenic Steroids	androsterone sulfate	2479-86-9	19988780	HMDB0002759		159663
100001083	Amino Acid	Tryptophan Metabolism	indolepropionate	830-96-6	3613	HMDB0002302		3744
100001086	Xenobiotics	Food Component/Plant	N-(2-furoyl)glycine	5657-19-2,5657-19-2	20549	HMDB0000439		21863
100001092	Cofactors and Vitamins	Nicotinate and Nicotinamide Metabolism	trigonelline (N'-methylnicotinate)	535-83-1	5369	HMDB0000875	C01004	5570
100001102	Lipid	Fatty Acid, Dicarboxylate	dodecanedioate (C12-DC)	693-23-2	12213	HMDB0000623	C02678	12736
100001103	Amino Acid	Glutamate Metabolism	glutamate, gamma-methyl ester	1499-55-4,1499-55-4	66546	HMDB0061715		68662
100001104	Amino Acid	Tyrosine Metabolism	N-acetyltyrosine	537-55-3	61606	HMDB0000866		68310
100001106	Xenobiotics	Xanthine Metabolism	1,3-dimethylurate	944-73-0	63527	HMDB0001857		70346
100001108	Xenobiotics	Xanthine Metabolism	3-methylxanthine	1076-22-8	63805	HMDB0001886	C16357	70639
100001112	Lipid	Fatty Acid, Monohydroxy	3-hydroxylaurate	53941-38-1	85026	HMDB0000387		94216
100001121	Cofactors and Vitamins	Vitamin B6 Metabolism	pyridoxate	82-82-6	6467	HMDB0000017	C00847	6723
100001126	Peptide	Gamma-glutamyl Amino Acid	gamma-glutamylvaline	2746-34-1		HMDB0011172		7015683
100001129	Amino Acid	Glycine, Serine and Threonine Metabolism	O-acetylhomoserine	7540-67-2	388506	HMDB0029423	C01077	439389
100001145	Lipid	Fatty Acid, Monohydroxy	3-hydroxysebacate	73141-46-5	2285525	HMDB0000350		3017884
100001148	Lipid	Fatty Acid, Monohydroxy	5-hydroxyhexanoate	44843-89-2	149280	HMDB0000409,HMDB0000525		170748
100001150	Lipid	Fatty Acid Metabolism (also BCAA Metabolism)	propionylglycine	21709-90-0	89122	HMDB0000783		98681
100001151	Lipid	Fatty Acid Metabolism (also BCAA Metabolism)	butyrylglycine	20208-73-5	79766	HMDB0000808		88412
100001162	Lipid	Fatty Acid Metabolism (also BCAA Metabolism)	propionylcarnitine (C3)	17298-37-2	96904	HMDB0000824	C03017	107738
100001167	Amino Acid	Urea cycle; Arginine and Proline Metabolism	pro-hydroxy-pro	18684-24-7	9847785	HMDB0006695		11902893
100001170	Amino Acid	Leucine, Isoleucine and Valine Metabolism	3-hydroxy-2-ethylpropionate	4374-62-3	164207	HMDB0000396		188979
100001178	Lipid	Fatty Acid, Dicarboxylate	3-carboxy-4-methyl-5-propyl-2-furanpropanoate (CMPF)	86879-39-2	110498	HMDB0061112		123979
100001181	Lipid	Long Chain Polyunsaturated Fatty Acid (n3 and n6)	docosapentaenoate (n3 DPA; 22:5n3)	2234-74-4		HMDB0006528,HMDB0001976	C16513	6441454
100001182	Lipid	Long Chain Polyunsaturated Fatty Acid (n3 and n6)	docosadienoate (22:2n6)	7370-49-2	4445934	HMDB0061714	C16533	5282807
100001193	Lipid	Long Chain Polyunsaturated Fatty Acid (n3 and n6)	adrenate (22:4n6)	2091-25-0	4445971	HMDB0002226	C16527	5282844,5497181
100001197	Lipid	Medium Chain Fatty Acid	10-undecenoate (11:1n1)	1333-28-4	10771160	HMDB0033724	C13910	14891
100001198	Lipid	Long Chain Monounsaturated Fatty Acid	myristoleate (14:1n5)	544-64-9	4444564	HMDB0002000	C08322	5281119
100001207	Amino Acid	Histidine Metabolism	4-imidazoleacetate	645-65-8	86856	HMDB0002024	C02835	96215
100001208	Amino Acid	Histidine Metabolism	1-methyl-4-imidazoleacetate	2625-49-2	68319	HMDB0002820	C05828	75810
100001211	Lipid	Fatty Acid, Dicarboxylate	sebacate (C10-DC)	111-20-6	5004	HMDB0000792	C08277	5192
100001226	Cofactors and Vitamins	Hemoglobin and Porphyrin Metabolism	I-urobilinogen	14684-37-8	24980	HMDB0004157	C05789	9548718
100001229	Lipid	Long Chain Polyunsaturated Fatty Acid (n3 and n6)	stearidonate (18:4n3)	111174-40-4	4471933	HMDB0006547	C16300	5312508
100001232	Lipid	Medium Chain Fatty Acid	5-dodecenoate (12:1n7)	2430-94-6	4471803	HMDB0000529		5312378
100001247	Lipid	Fatty Acid Metabolism (Acyl Carnitine, Medium Chain)	octanoylcarnitine (C8)	3671-77-0	110274	HMDB0000791	C02838	123701,11953814
100001250	Lipid	Primary Bile Acid Metabolism	tauro-beta-muricholate	25696-60-0	147312	HMDB0000932		121596216,21124703,168408
100001251	Lipid	Fatty Acid Metabolism (Acyl Carnitine, Medium Chain)	decanoylcarnitine (C10)	1492-27-9	8420677	HMDB0000651		10245190
100001253	Amino Acid	Glutamate Metabolism	N-acetylglutamine	2490-97-3	158492	HMDB0006029	C02716	182230
100001254	Amino Acid	Tryptophan Metabolism	N-acetyltryptophan	1218-34-4	610602	HMDB0013713	C03137	439917,700653
100001256	Amino Acid	Phenylalanine Metabolism	N-acetylphenylalanine	2018-61-3	67404	HMDB0000512	C03519	74839
100001257	Amino Acid	Alanine and Aspartate Metabolism	N-acetylasparagine	4033-40-3	90090	HMDB0006028		99715
100001262	Peptide	Gamma-glutamyl Amino Acid	gamma-glutamyl-epsilon-lysine	17105-15-6	5378717	HMDB0003869		7015685
100001263	Lipid	Lysophospholipid	1-palmitoyl-GPC (16:0)	17364-16-8	78064	HMDB0010382	C04102	86554
100001266	Amino Acid	Urea cycle; Arginine and Proline Metabolism	N-acetylarginine	155-84-0	60752	HMDB0004620	C02562	67427
100001267	Xenobiotics	Food Component/Plant	piperine	94-62-2	553590	HMDB0029377	C03882	638024
100001269	Lipid	Sterol	campesterol	474-62-4	151215	HMDB0002869	C01789	173183
100001270	Lipid	Fatty Acid Metabolism (Acyl Carnitine, Long Chain Saturated)	myristoylcarnitine (C14)	18822-89-4	4932274	HMDB000506		6426854
100001271	Lipid	Lysophospholipid	1-stearoyl-GPC (18:0)	19420-57-6	435389	HMDB0010384		497300
100001272	Lipid	Lysophospholipid	1-oleoyl-GPC (18:1)	19420-56-5	17240641	HMDB0002815	C03916	16081932
100001274	Amino Acid	Glycine, Serine and Threonine Metabolism	N-acetylthreonine	17093-74-2	3841173	HMDB0062557		152204
100001276	Amino Acid	Leucine, Isoleucine and Valine Metabolism	N-acetylisoleucine	3077-46-1	2081100	HMDB0061684		306109
100001277	Lipid	Long Chain Monounsaturated Fatty Acid	10-nonadecenoate (19:1n9)	73033-09-7	4471938	HMDB0013622		5312513
100001278	Lipid	Long Chain Monounsaturated Fatty Acid	10-heptadecenoate (17:1n7)	29743-97-3	4471860	HMDB0060038		5312435
100001279	Lipid	Secondary Bile Acid Metabolism	hyocholate	547-75-1	21403098	HMDB0000760	C17649	92805
100001287	Lipid	Androgenic Steroids	epiandrosterone sulfate	22229-22-7	21403101	HMDB0062657	C04555	9929317
100001293	Amino Acid	Histidine Metabolism	N-acetylhistidine	39145-52-3	68142	HMDB0032055	C02997	75619
100001294	Peptide	Gamma-glutamyl Amino Acid	gamma-glutamylglycine	1948-29-4	145071	HMDB0011667		100099
100001295	Peptide	Gamma-glutamyl Amino Acid	gamma-glutamyltryptophan	66471-20-3	2302065	HMDB0029160		3989307
100001296	Xenobiotics	Food Component/Plant	stachydrine	4136-37-2	103115	HMDB0004827	C10172	115244
100001300	Amino Acid	Leucine, Isoleucine and Valine Metabolism	alpha-hydroxyisovalerate	600-37-3	90190	HMDB0000407		99823
100001313	Peptide	Gamma-glutamyl Amino Acid	gamma-glutamylmethionine	17663-87-5	5373147	HMDB0029155		7009567
100001314	Peptide	Gamma-glutamyl Amino Acid	gamma-glutamylthreonine	5652-48-2	21403107	HMDB0029159		76078708
100001315	Xenobiotics	Benzoate Metabolism	p-cresol sulfate	3233-57-7	3806480	HMDB0011635		4615423
100001320	Carbohydrate	Aminosugar Metabolism	erythronate*	88759-55-1	2061231	HMDB0000613		2781043
100001332	Xenobiotics	Drug - Analgesics, Anesthetics	salicyluric glucuronide*		21403117	HMDB0240252		121596205
100001334	Amino Acid	Urea cycle; Arginine and Proline Metabolism	N-acetylproline	1074-79-9	285677	HMDB0094701		322640
100001335	Lipid	Long Chain Monounsaturated Fatty Acid	eicosenoate (20:1)		4445895	HMDB0002231,HMDB0062436	C16526	5282768,5282769,94159
100001337	Lipid	Long Chain Polyunsaturated Fatty Acid (n3 and n6)	linolenate [alpha or gamma; (18:3n3 or 6)]		4444437	HMDB0003073,HMDB0001388	C06426,C06427	5280933,5280934
100001359	Energy	TCA Cycle	aconitate [cis or trans]			HMDB0000958,HMDB000072	C004174,C02341	444212,643757
100001386	Cofactors and Vitamins	Hemoglobin and Porphyrin Metabolism	heme	14875-96-8		HMDB0003178	C00032	26945
100001391	Lipid	Fatty Acid Metabolism (Acyl Carnitine, Long Chain Saturated)	stearoylcarnitine (C18)	18822-91-8	21233653	HMDB0000848		3006797
100001392	Lipid	Fatty Acid Metabolism (Acyl Carnitine, Medium Chain)	laurylcarnitine (C12)	25518-54-1	8602997	HMDB000225		168381
100001393	Amino Acid	Leucine, Isoleucine and Valine Metabolism	isovalerylcarnitine (C5)	31023-24-2	4932271	HMDB0000688	C20826	169235
100001395	Lipid	Lysophospholipid	1-linoleoyl-GPC (18:2)		10160888	HMDB0010386	C04100	11988421
100001396	Xenobiotics	Xanthine Metabolism	7-methylxanthine	552-62-5	61660	HMDB0001991	C16353	68374
100001397	Xenobiotics	Xanthine Metabolism	1,3,7-trimethylurate	5415-44-1	71754	HMDB0002123	C16361	79437
100001398	Xenobiotics	Xanthine Metabolism	3,7-dimethylurate	13087-49-5	74994	HMDB0001982	C16360	83126
100001399	Xenobiotics	Xanthine Metabolism	1,7-dimethylurate	33868-03-0	82720	HMDB0011103	C16356	91611
100001400	Xenobiotics	Xanthine Metabolism	1-methylurate	708-79-2	62926	HMDB0003099	C16359	69726
100001402	Xenobiotics	Xanthine Metabolism	5-acetylamino-6-formylamino-3-methyluracil	85438-96-6	97287	HMDB0011105	C16365	108214
100001403	Xenobiotics	Xanthine Metabolism	5-acetylamino-6-amino-3-methyluracil	1196153-01-1	79659	HMDB0004400	C16366	88299
100001405	Xenobiotics	Xanthine Metabolism	1-methylxanthine	6136-37-4	72464	HMDB0010738	C16358	80220
100001409	Nucleotide	Purine Metabolism, (Hypo)Xanthine/Inosine containing	N1-methylinosine	20245-33-4	513976	HMDB0002721		650095
100001412	Nucleotide	Purine Metabolism, Guanine containing	N2,N2-dimethylguanosine	2140-67-2	83878	HMDB0004824		135501639
100001413	Nucleotide	Pyrimidine Metabolism, Cytidine containing	N4-acetylcytidine	3768-18-1	96702	HMDB0005923		107461
100001415	Nucleotide	Purine Metabolism, Adenine containing	N6-carbamoylthreonyladenosine	24719-82-2	141829	HMDB0041623		161466
100001416	Nucleotide	Pyrimidine Metabolism, Orotate containing	orotidine	314-50-1	83729	HMDB0000788		92751
100001417	Peptide	Acetylated Peptides	phenylacetylglutamine	28047-15-6	270643	HMDB0006344	C04148	92258
100001423	Xenobiotics	Benzoate Metabolism	4-hydroxyhippurate	2482-25-9	133104	HMDB0013678		151012
100001425	Nucleotide	Pyrimidine Metabolism, Uracil containing	5,6-dihydrouridine	5627-05-4	85115	HMDB0000497		94312
100001426	Nucleotide	Pyrimidine Metabolism, Uracil containing	3-(3-amino-3-carboxypropyl)uridine*	52745-94-5	149669			171198
100001433	Lipid	Monoacylglycerol	1-arachidonylglycerol (20:4)	35474-99-8	4445452	HMDB11578	C13857	16019980,5282281
100001437	Amino Acid	Glutathione Metabolism	cysteine-glutathione disulfide	13081-14-6	3455404	HMDB0000656	R00900	3080690
100001445	Lipid	Lysophospholipid	1-palmitoyl-GPA (16:0)	17618-08-5	4925335	HMDB00327	C04036	6419701
100001446	Nucleotide	Pyrimidine Metabolism, Uracil containing	5-methyluridine (ribothymidine)	1463-10-1	393058	HMDB0000884		445408
100001452	Amino Acid	Leucine, Isoleucine and Valine Metabolism	isovalerylglycine	16284-60-9	475516	HMDB00678		546304
100001456	Nucleotide	Purine Metabolism, Guanine containing	7-methylguanine	578-76-7	10883	HMDB0000897	C02242	135398679
100001461	Lipid	Lysophospholipid	1-stearoyl-GPE (18:0)	69747-55-3	7826018	HMDB0011130		9547068
100001462	Lipid	Lysophospholipid	1-stearoyl-GPG (18:0)		21403138
100001466	Nucleotide	Pyrimidine Metabolism, Cytidine containing	3-methylcytidine	21028-20-6	9164190	HMDB0240577		14237477
100001468	Cofactors and Vitamins	Nicotinate and Nicotinamide Metabolism	N1-Methyl-2-pyridone-5-carboxamide	701-44-0	62899	HMDB0004193	C05842	69698
100001469	Cofactors and Vitamins	Nicotinate and Nicotinamide Metabolism	N1-Methyl-4-pyridone-3-carboxamide	769-49-3	389671	HMDB0004194	C05843	440810
100001472	Lipid	Long Chain Polyunsaturated Fatty Acid (n3 and n6)	mead acid (20:3n9)	20590-32-3	4471956	HMDB0010378		5312531
100001485	Peptide	Gamma-glutamyl Amino Acid	gamma-glutamylisoleucine*		21403145	HMDB0011170		22885096
100001501	Lipid	Fatty Acid Metabolism (Acyl Carnitine, Monounsaturated)	oleoylcarnitine (C18:1)	38677-66-6	21403150	HMDB0005065		6441392
100001502	Peptide	Gamma-glutamyl Amino Acid	gamma-glutamyl-2-aminobutyrate	16869-42-4	21403151
100001509	Amino Acid	Leucine, Isoleucine and Valine Metabolism	2-methylbutyrylcarnitine (C5)	31023-25-3	4932320	HMDB0000378		6426901
100001510	Amino Acid	Tyrosine Metabolism	phenol sulfate	937-34-8	67018	HMDB0060015	C02180	74426
100001511	Lipid	Lysophospholipid	1-palmitoleoyl-GPC (16:1)*		21403152	HMDB0010383		24779461
100001527	Lipid	Fatty Acid Metabolism (Acyl Glycine)	hexanoylglycine	24003-67-6	89859	HMDB0000701		99463
100001540	Partially Characterized Molecules	Partially Characterized Molecules	glutamine_degradant*	2353-44-8
100001541	Amino Acid	Leucine, Isoleucine and Valine Metabolism	2-hydroxy-3-methylvalerate	488-15-3	144317	HMDB0000317		164623
100001550	Xenobiotics	Food Component/Plant	homostachydrine*	1195-94-4	390180	HMDB0033433	C08283	441447
100001551	Lipid	Lysophospholipid	1-arachidonoyl-GPC (20:4n6)*		21403155	HMDB0010395	C05208	24779476
100001562	Lipid	Lysophospholipid	2-palmitoyl-GPC (16:0)*		21403165	HMDB0061702		15061532
100001567	Lipid	Lysophospholipid	1-palmitoyl-GPE (16:0)	53862-35-4	7826019	HMDB0011503		9547069
100001569	Lipid	Lysophospholipid	1-oleoyl-GPE (18:1)	89576-29-4	7826021	HMDB0011506		9547071
100001570	Lipid	Lysophospholipid	1-linoleoyl-GPE (18:2)*		21403170	HMDB0011507		52925130
100001571	Lipid	Lysophospholipid	1-arachidonoyl-GPE (20:4n6)*		21403171	HMDB0011517		42607465
100001577	Amino Acid	Urea cycle; Arginine and Proline Metabolism	N-acetylcitrulline	33965-42-3	571213	HMDB0000856	C15532,C02851	656979
100001579	Lipid	Fatty Acid, Monohydroxy	2-hydroxypalmitate	764-67-0	83805	HMDB0031057		12575964,92836,11065598
100001580	Lipid	Long Chain Polyunsaturated Fatty Acid (n3 and n6)	docosapentaenoate (n6 DPA; 22:5n6)	25182-74-5	4945614	HMDB0001976	C16513	6441454
100001586	Cofactors and Vitamins	Ascorbate and Aldarate Metabolism	gulonate*	20246-53-1	7969943	HMDB0003290	C00800	152304
100001590	Amino Acid	Leucine, Isoleucine and Valine Metabolism	isobutyrylglycine	15926-18-8	9030891	HMDB0000730		10855600
100001593	Amino Acid	Lysine Metabolism	glutarylcarnitine (C5-DC)	102636-82-8	21403175	HMDB0013130		71317118
100001597	Amino Acid	Leucine, Isoleucine and Valine Metabolism	tiglylcarnitine (C5:1-DC)	64191-86-2	17216200	HMDB0002366		22833596
100001604	Xenobiotics	Drug - Topical Agents	hydroquinone sulfate	123-31-9	141624	HMDB0240263	C00530	161220
100001605	Xenobiotics	Benzoate Metabolism	catechol sulfate	4918-96-1	2341024	HMDB0059724		3083879
100001606	Lipid	Sterol	cholesterol sulfate	2864-50-8	4371550	HMDB00653	C18043	65076
100001609	Lipid	Sterol	7-alpha-hydroxy-3-oxo-4-cholestenoate (7-Hoca)	115538-85-7	2338765	HMDB0012458	C17337	3081085
100001612	Amino Acid	Glutamate Metabolism	N-acetyl-aspartyl-glutamate (NAAG)	3106-85-2	5065	HMDB0001067	C12270	188803
100001613	Lipid	Fatty Acid, Dicarboxylate	tetradecanedioate (C14-DC)	821-38-5	12630	HMDB0000872		13185
100001614	Lipid	Fatty Acid, Dicarboxylate	hexadecanedioate (C16-DC)	505-54-4	10027	HMDB0000672	C19615	10459
100001615	Lipid	Fatty Acid, Dicarboxylate	octadecanedioate (C18-DC)	871-70-5	63283	HMDB0000782		70095
100001617	Lipid	Fatty Acid, Dicarboxylate	undecanedioate (C11-DC)	1852-04-6	15037	HMDB0000888		15816
100001620	Lipid	Phospholipid Metabolism	glycerophosphoethanolamine	33049-08-0	110410	HMDB0000114	C01233	123874
100001621	Lipid	Phospholipid Metabolism	glycerophosphoinositol*	16824-65-0				167572
100001624	Xenobiotics	Benzoate Metabolism	3-(3-hydroxyphenyl)propionate	621-54-5	89	HMDB0000375	C11457	91
100001654	Lipid	Lysophospholipid	1-arachidonoyl-GPI (20:4)*			HMDB0061690		121596217
100001655	Lipid	Lysophospholipid	1-palmitoyl-GPI (16:0)			HMDB0061695		71296207
100001657	Lipid	Secondary Bile Acid Metabolism	glycolithocholate sulfate*	15324-64-8	65188	HMDB0002639	C11301	72222
100001658	Lipid	Secondary Bile Acid Metabolism	taurolithocholate 3-sulfate	64936-83-0	389078	HMDB0002580	C03642	440071
100001662	Lipid	Carnitine Metabolism	deoxycarnitine	6249-56-5	705	HMDB0001161	C01181	22620
100001664	Nucleotide	Purine Metabolism, Adenine containing	N6-succinyladenosine	4542-23-8		HMDB0000912		165243
100001668	Amino Acid	Histidine Metabolism	1-ribosyl-imidazoleacetate*	29605-99-0	4292299	HMDB0002331	C05131	440569
100001718	Xenobiotics	Benzoate Metabolism	2,4,6-trihydroxybenzoate	83-30-7	59891	HMDB0029649		66520
100001723	Lipid	Fatty Acid, Monohydroxy	alpha-hydroxycaproate	6064-63-7	90191	HMDB0001624		99824
100001730	Lipid	Fatty Acid, Dihydroxy	3,4-dihydroxybutyrate	51267-44-8		HMDB0000337		150929
100001733	Lipid	Fatty Acid Metabolism (Acyl Glutamine)	hexanoylglutamine
100001734	Amino Acid	Lysine Metabolism	N6-acetyllysine	692-04-6	83801	HMDB0000206	C02727	92832
100001739	Lipid	Long Chain Polyunsaturated Fatty Acid (n3 and n6)	dihomo-linolenate (20:3n3 or n6)	17046-59-2	4471954	HMDB0002925	C03242	5280581
100001740	Carbohydrate	Fructose, Mannose and Galactose Metabolism	mannitol/sorbitol		440	HMDB0000247,HMDB0000765	C00392,C00794	5780,6251
100001743	Amino Acid	Tryptophan Metabolism	tryptophan betaine	20671-76-5	390633	HMDB0061115	C09213	442106
100001755	Xenobiotics	Benzoate Metabolism	4-vinylphenol sulfate	2628-17-3	4932200	HMDB0062775	C05627	6426766
100001756	Xenobiotics	Benzoate Metabolism	4-ethylphenylsulfate	123-07-9		HMDB0062551	C13637	20822574
100001757	Xenobiotics	Food Component/Plant	thymol sulfate	89-83-8	10709958	HMDB0062720	C09908	12456386
100001767	Xenobiotics	Food Component/Plant	pyrraline	74509-14-1	19980286	HMDB0033143	C21013	14274616
100001777	Lipid	Lysophospholipid	1-oleoyl-GPI (18:1)			HMDB0061693		86289645
100001778	Lipid	Lysophospholipid	1-linoleoyl-GPI (18:2)*			HMDB0240597		11124828
100001791	Xenobiotics	Drug - Analgesics, Anesthetics	2-hydroxyacetaminophen sulfate*		34448632	HMDB0062547		86290013
100001793	Xenobiotics	Drug - Analgesics, Anesthetics	2-methoxyacetaminophen sulfate*		34448633	HMDB0062550		86290014
100001795	Xenobiotics	Drug - Analgesics, Anesthetics	2-methoxyacetaminophen glucuronide*		52083351	HMDB0240215		121596203
100001806	Xenobiotics	Benzoate Metabolism	o-cresol sulfate		9790277	HMDB0011635		11615528
100001809	Xenobiotics	Benzoate Metabolism	2-ethylphenylsulfate
100001810	Amino Acid	Urea cycle; Arginine and Proline Metabolism	dimethylarginine (SDMA + ADMA)	102783-24-4	110375	HMDB0003334,HMDB0001539	C21189,C03626	123831,169148
100001851	Amino Acid	Glycine, Serine and Threonine Metabolism	N-acetylserine	97-14-3	58744	HMDB0002931		65249
100001856	Lipid	Phosphatidylethanolamine (PE)	1-stearoyl-2-oleoyl-GPE (18:0/18:1)			HMDB0008993		9546742
100001859	Lipid	Inositol Metabolism	chiro-inositol	643-12-9	10254647	HMDB0240209	C19891
100001868	Xenobiotics	Food Component/Plant	4-allylphenol sulfate					66633409
100001869	Lipid	Phosphatidylcholine (PC)	1-stearoyl-2-arachidonoyl-GPC (18:0/20:4)	35418-59-8	17347139	HMDB0008048		16219824
100001870	Lipid	Phosphatidylethanolamine (PE)	1-palmitoyl-2-linoleoyl-GPE (16:0/18:2)		7825697	HMDB0005322		9546747
100001872	Lipid	Phosphatidylserine (PS)	1-stearoyl-2-arachidonoyl-GPS (18:0/20:4)			HMDB0012383		24779545
100001876	Lipid	Sphingolipid Synthesis	sphinganine-1-phosphate	19794-97-9	505	HMDB0001383		520
100001882	Lipid	Hexosylceramides (HCER)	glycosyl-N-stearoyl-sphingosine (d18:1/18:0)
100001950	Cofactors and Vitamins	Hemoglobin and Porphyrin Metabolism	bilirubin (E,E)*		4474753	HMDB0240584		129320511
100001951	Cofactors and Vitamins	Hemoglobin and Porphyrin Metabolism	bilirubin (E,Z or Z,E)*		4705847	HMDB0000488	C00486	5799469
100001956	Amino Acid	Urea cycle; Arginine and Proline Metabolism	N-methylproline	475-11-6	541	HMDB0094696		643474
100001977	Cofactors and Vitamins	Vitamin A Metabolism	beta-cryptoxanthin	472-70-8	4904571	HMDB0033844	C08591	5281235
100001987	Lipid	Androgenic Steroids	5alpha-androstan-3beta,17beta-diol disulfate	571-20-0		HMDB00493	C12525	90186325
100001988	Lipid	Progestin Steroids	5alpha-pregnan-3beta,20alpha-diol disulfate			HMDB0094650		118703093
100001989	Lipid	Secondary Bile Acid Metabolism	glycocholenate sulfate*
100001990	Lipid	Secondary Bile Acid Metabolism	taurocholenate sulfate*
100001992	Lipid	Androgenic Steroids	androstenediol (3beta,17beta) disulfate (1)			HMDB0240313	C04295	87120982
100001993	Lipid	Pregnenolone Steroids	pregnenediol disulfate (C21H34O8S2)*
100001994	Lipid	Androgenic Steroids	androstenediol (3beta,17beta) disulfate (2)			HMDB0240313		87120982
100001999	Lipid	Pregnenolone Steroids	21-hydroxypregnenolone disulfate	1164-98-3	118625			134595
100002003	Lipid	Pregnenolone Steroids	21-hydroxypregnenolone monosulfate (1)	88378-34-1	152343			174681
100002004	Lipid	Pregnenolone Steroids	21-hydroxypregnenolone monosulfate (2)		8845826			10670474
100002007	Lipid	Androgenic Steroids	5alpha-androstan-3alpha,17alpha-diol disulfate
100002008	Lipid	Androgenic Steroids	5alpha-androstan-3alpha,17alpha-diol monosulfate			HMDB0000412
100002009	Lipid	Progestin Steroids	5alpha-pregnan-3beta,20beta-diol monosulfate (1)			HMDB0240580
100002014	Lipid	Progestin Steroids	5alpha-pregnan-3beta,20alpha-diol monosulfate (2)
100002015	Lipid	Progestin Steroids	5alpha-pregnan-diol disulfate		4302261	HMDB0240581,HMDB0240582		3082277,5127902
100002017	Lipid	Androgenic Steroids	5alpha-androstan-3alpha,17beta-diol disulfate			HMDB0094682		56639109
100002018	Lipid	Androgenic Steroids	5alpha-androstan-3alpha,17beta-diol monosulfate (1)					121596226,121596225
100002021	Lipid	Androgenic Steroids	5alpha-androstan-3beta,17alpha-diol disulfate			HMDB0094682		56639109
100002024	Lipid	Androgenic Steroids	5alpha-androstan-3beta,17beta-diol monosulfate (2)
100002026	Lipid	Androgenic Steroids	androstenediol (3alpha, 17alpha) monosulfate (2)
100002027	Lipid	Androgenic Steroids	androstenediol (3alpha, 17alpha) monosulfate (3)
100002028	Lipid	Androgenic Steroids	androstenediol (3beta,17beta) monosulfate (1)	521-17-5		HMDB0240429		129670631,13847309
100002029	Lipid	Androgenic Steroids	androstenediol (3beta,17beta) monosulfate (2)			HMDB0240429,HMDB0186954
100002067	Lipid	Pregnenolone Steroids	pregnenediol sulfate (C21H34O5S)*	1247-64-9	13465233	HMDB0000774	C18044	105074
100002070	Lipid	Fatty Acid, Dicarboxylate	2-hydroxyglutarate	40951-21-1	42	HMDB0059655	C02630	43
100002094	Cofactors and Vitamins	Tocopherol Metabolism	gamma-CEHC	178167-75-4	117455	HMDB0001931		133098
100002102	Nucleotide	Pyrimidine Metabolism, Uracil containing	N-acetyl-beta-alanine	3025-95-4	68881	HMDB0061880	C01073	76406
100002106	Lipid	Sphingomyelins	sphingomyelin (d18:1/18:1, d18:2/18:0)	108392-10-5	4947837	HMDB0012101		6443882
100002107	Lipid	Sphingomyelins	palmitoyl sphingomyelin (d18:1/16:0)	6254-89-3	8115562	HMDB0010169		9939941
100002113	Amino Acid	Methionine, Cysteine, SAM and Taurine Metabolism	cysteine sulfinic acid	207121-48-0	107	HMDB0000996	C00606	109
100002122	Xenobiotics	Benzoate Metabolism	3-hydroxyhippurate	1637-75-8	396603	HMDB0006116		450268
100002126	Lipid	Androgenic Steroids	16a-hydroxy DHEA 3-sulfate			HMDB0062544		20848950
100002128	Lipid	Pregnenolone Steroids	17alpha-hydroxypregnenolone 3-sulfate	28901-70-4	134824	HMDB00416		152971
100002129	Lipid	Pregnenolone Steroids	pregnenolone sulfate	1247-64-9	94802	HMDB0000774	C18044	105074
100002152	Lipid	Androgenic Steroids	andro steroid monosulfate C19H28O6S (1)*			HMDB0002759		159663
100002154	Xenobiotics	Food Component/Plant	ergothioneine	58511-63-0	2297320	HMDB0003045	C05570	5351619
100002183	Amino Acid	Methionine, Cysteine, SAM and Taurine Metabolism	S-methylmethionine	3493-12-7	8351775	HMDB0038670	C05319	458
100002185	Amino Acid	Tryptophan Metabolism	indole-3-carboxylate	771-50-6		HMDB0003320	C19837	69867
100002196	Lipid	Fatty Acid, Monohydroxy	13-HODE + 9-HODE			HMDB0004670,HMDB0004667	C14767,C14762	5312830,5282945,1424,5282947,5282944
100002199	Lipid	Fatty Acid, Dicarboxylate	tridecenedioate (C13:1-DC)*
100002241	Xenobiotics	Xanthine Metabolism	7-methylurate	612-37-3	62375	HMDB0011107	C16355	69160
100002253	Xenobiotics	Food Component/Plant	cinnamoylglycine	16534-24-0	618829	HMDB0011621		709625
100002254	Lipid	Endocannabinoid	stearoyl ethanolamide	111-57-9	25958	HMDB0013078		27902
100002259	Lipid	Fatty Acid Metabolism (Acyl Carnitine, Monounsaturated)	cis-4-decenoylcarnitine (C10:1)	98930-66-6	28639171	HMDB0013205		57357170
100002284	Lipid	Fatty Acid, Dihydroxy	2S,3R-dihydroxybutyrate	5057-93-2	9139682	HMDB0002453		10964471
100002356	Lipid	Fatty Acid, Branched	(16 or 17)-methylstearate (a19:0 or i19:0)	2724-59-6	2340933	HMDB0037397		3083779
100002367	Lipid	Fatty Acid, Dihydroxy	2R,3R-dihydroxybutyrate	759-06-8	17215960	HMDB0000498		13120901
100002397	Amino Acid	Glutamate Metabolism	alpha-ketoglutaramate*	18465-19-5		HMDB0001552	C00940	48
100002417	Xenobiotics	Food Component/Plant	2,3-dihydroxyisovalerate	1756-18-9	657	HMDB0012141	C04039	677
100002458	Amino Acid	Leucine, Isoleucine and Valine Metabolism	3-methylglutaconate	5746-90-7	1267861	HMDB0000522		1551553
100002462	Amino Acid	Lysine Metabolism	5-(galactosylhydroxy)-L-lysine	32448-36-5				66995551
100002466	Amino Acid	Glutathione Metabolism	cysteinylglycine disulfide*	70555-24-7	17215992	HMDB0000709		22833544
100002488	Lipid	Secondary Bile Acid Metabolism	isoursodeoxycholate	78919-26-3	113205	HMDB0000686	C17662	127601
100002500	Amino Acid	Histidine Metabolism	formiminoglutamate	816-90-0	388370	HMDB0000854	C00439	439233
100002514	Amino Acid	Histidine Metabolism	hydantoin-5-propionate	5624-26-0	761	HMDB0001212	C05565	782
100002528	Xenobiotics	Chemical	sulfate*	14808-79-8	1086	HMDB01448	C00059	5152822
100002537	Lipid	Fatty Acid, Dicarboxylate	4-hydroxy-2-oxoglutaric acid	1187-99-1	579	HMDB0002070	C01127	599
100002544	Amino Acid	Glutamate Metabolism	4-hydroxyglutamate	2485-33-8	388936	HMDB0001344	C03079	439902
100002613	Cofactors and Vitamins	Pantothenate and CoA Metabolism	pantoate	470-29-1	388387	HMDB0240389	C00522	5289105
100002749	Amino Acid	Methionine, Cysteine, SAM and Taurine Metabolism	S-methylcysteine	1187-84-4	22826	HMDB0002108		24417,7058174,88180
100002761	Lipid	Androgenic Steroids	androsterone glucuronide	1852-43-3	102793	HMDB0002829	C11135	114833
100002769	Amino Acid	Urea cycle; Arginine and Proline Metabolism	argininate*	157-07-3	140984	HMDB0003148		160437
100002784	Amino Acid	Urea cycle; Arginine and Proline Metabolism	2-oxoarginine*	3715-10-4	542	HMDB0004225	C03771	558
100002796	Lipid	Medium Chain Fatty Acid	cis-4-decenoate (10:1n6)*	505-90-8	4471776	HMDB0004980		5282726
100002873	Lipid	Lysophospholipid	1-lignoceroyl-GPC (24:0)	325171-59-3	24766539	HMDB0010405		24779481
100002875	Lipid	Lysoplasmalogen	1-(1-enyl-palmitoyl)-GPC (P-16:0)*		9093054	HMDB0010407		10917802
100002910	Amino Acid	Histidine Metabolism	1-methyl-5-imidazoleacetate	4200-48-0	4954265	HMDB04988		6451814
100002911	Lipid	Secondary Bile Acid Metabolism	glycoursodeoxycholate	64480-66-6	19973534	HMDB0000708		12310288
100002912	Lipid	Secondary Bile Acid Metabolism	tauroursodeoxycholate	14605-22-2	24539842	HMDB0000874		9848818
100002914	Xenobiotics	Benzoate Metabolism	3-(4-hydroxyphenyl)propionate	501-97-3	9965	HMDB0002199	C01744	10394
100002927	Amino Acid	Methionine, Cysteine, SAM and Taurine Metabolism	S-methylcysteine sulfoxide	6853-87-8	74136	HMDB0029432		82142
100002945	Lipid	Fatty Acid, Branched	(14 or 15)-methylpalmitate (a17:0 or i17:0)			HMDB0061859	C16995	8181,17903417
100002951	Lipid	Fatty Acid, Dicarboxylate	eicosanedioate (C20-DC)	2424-92-2	68030			75502
100002952	Lipid	Fatty Acid, Dicarboxylate	docosadioate (C22-DC)	505-56-6	214170		C14240	7641
100002953	Lipid	Fatty Acid, Monohydroxy	16-hydroxypalmitate	506-13-8	10034	HMDB0006294	C18218	10466
100002989	Lipid	Diacylglycerol	oleoyl-linoleoyl-glycerol (18:1/18:2) [1]	106292-55-1	23975985	HMDB0007219		14275396
100002990	Lipid	Diacylglycerol	oleoyl-linoleoyl-glycerol (18:1/18:2) [2]	104346-53-4	29788004	HMDB0007219		71433693
100003000	Lipid	Lysoplasmalogen	1-(1-enyl-palmitoyl)-GPE (P-16:0)*		10471193	HMDB0011152
100003001	Lipid	Lysoplasmalogen	1-(1-enyl-stearoyl)-GPE (P-18:0)*			HMDB0240598
100003119	Lipid	Endocannabinoid	N-oleoyltaurine	52514-04-2	4941625			6437033
100003151	Lipid	Fatty Acid Metabolism (Acyl Carnitine, Polyunsaturated)	linoleoylcarnitine (C18:2)*	36816-10-1	4952667	HMDB0006469		6450015
100003169	Peptide	Dipeptide	isoleucylglycine	868-28-0	303621	HMDB0028907		342532
100003240	Lipid	Endocannabinoid	N-stearoyltaurine	63155-80-6	147194			168274
100003258	Cofactors and Vitamins	Ascorbate and Aldarate Metabolism	2-O-methylascorbic acid	17860-87-6	90149	HMDB0240294		54726398
100003271	Amino Acid	Glutamate Metabolism	beta-citrylglutamate	73590-26-8	19992713		C20775	189741
100003397	Lipid	Phospholipid Metabolism	trimethylamine N-oxide	1184-78-7	1113	HMDB0000925	C01104	1145
100003415	Amino Acid	Lysine Metabolism	N6-methyllysine	1188-07-4	144469	HMDB0002038	C02728	164795
100003432	Xenobiotics	Food Component/Plant	dihydroferulate	1135-23-5	13701	HMDB0062121		14340
100003434	Amino Acid	Histidine Metabolism	imidazole propionate	1074-59-5	63798	HMDB0002271		70630
100003470	Lipid	Progestin Steroids	pregnanediol-3-glucuronide	1852-49-9	110346	HMDB0010318		123796
100003473	Xenobiotics	Food Component/Plant	alliin	556-27-4	78760	HMDB0033592	C08265	87310
100003674	Peptide	Dipeptide	prolylglycine	2578-57-6	4932143	HMDB0011178		6426709
100003686	Lipid	Fatty Acid Metabolism (Acyl Glycine)	N-palmitoylglycine	2441-41-0	133100	HMDB0013034		151008
100003695	Xenobiotics	Food Component/Plant	mannonate*	642-99-9	2496757			3246006
100003696	Xenobiotics	Chemical	succinimide	123-56-8	10955		C07273	11439
100003892	Amino Acid	Methionine, Cysteine, SAM and Taurine Metabolism	lanthionine	3183-08-2	88959			98504
100003901	Lipid	Lysophospholipid	2-stearoyl-GPE (18:0)*		24769218	HMDB0011129		90658453,53480667
100003926	Lipid	Fatty Acid Metabolism (Acyl Carnitine, Hydroxy)	(R)-3-hydroxybutyrylcarnitine			HMDB0013127		53481617
100004046	Amino Acid	Histidine Metabolism	N-acetylcarnosine	56353-15-2	8079136	HMDB0012881		9903482
100004059	Xenobiotics	Food Component/Plant	histidine betaine (hercynine)*	534-30-5	2340795	HMDB0029422		3083620
100004083	Lipid	Secondary Bile Acid Metabolism	glycohyocholate			HMDB0000138		71361462
100004084	Lipid	Secondary Bile Acid Metabolism	taurohyocholate*			HMDB0011637	C15516	11954195
100004089	Lipid	Fatty Acid, Monohydroxy	2-hydroxydecanoate	5393-81-7	20195	HMDB0094656		21488
100004111	Xenobiotics	Benzoate Metabolism	4-methylcatechol sulfate			HMDB0240459		54104170
100004112	Xenobiotics	Benzoate Metabolism	3-methyl catechol sulfate (1)					118431379
100004182	Lipid	Secondary Bile Acid Metabolism	3b-hydroxy-5-cholenoic acid	5255-17-4	83950	HMDB0000308		92997
100004208	Xenobiotics	Benzoate Metabolism	guaiacol sulfate		21078	HMDB0060013		22473
100004227	Lipid	Fatty Acid, Amino	2-aminooctanoate	644-90-6	62727	HMDB0000991		69522
100004243	Cofactors and Vitamins	Tocopherol Metabolism	gamma-CEHC glucuronide*					121596235
100004284	Xenobiotics	Chemical	dimethyl sulfone	67-71-0	5978	HMDB0004983	C11142	6213
100004295	Xenobiotics	Food Component/Plant	2-piperidinone	675-20-7	12144	HMDB0011749		12665
100004318	Xenobiotics	Food Component/Plant	indolin-2-one	59-48-3	284794		C12312	321710
100004322	Xenobiotics	Food Component/Plant	2-aminophenol sulfate		158022	HMDB0061116		181670
100004328	Lipid	Sphingomyelins	sphingomyelin (d18:1/14:0, d16:1/16:0)*		9608732	HMDB0012097		11433862
100004329	Lipid	Sphingomyelins	sphingomyelin (d18:2/16:0, d18:1/16:1)*			HMDB0240638,HMDB0240613
100004396	Lipid	Fatty Acid, Dicarboxylate	3-hydroxyadipate		133894	HMDB0000345		151913
100004442	Lipid	Lysophospholipid	1-arachidonoyl-GPA (20:4)	799268-65-8		HMDB0062312		42607498
100004499	Amino Acid	Lysine Metabolism	6-oxopiperidine-2-carboxylate	34622-39-4	2282737	HMDB0061705		3014237
100004509	Xenobiotics	Food Component/Plant	S-allylcysteine	21593-77-1	88744	HMDB0034323		98280
100004523	Amino Acid	Urea cycle; Arginine and Proline Metabolism	N-delta-acetylornithine		8096135	HMDB0003357	C00437	9920500
100004541	Amino Acid	Polyamine Metabolism	acisoga	106692-36-8	114601	HMDB0061384		129397
100004542	Lipid	Fatty Acid, Amino	2-aminoheptanoate	1115-90-8	198338	HMDB0094649		227939
100004561	Amino Acid	Tryptophan Metabolism	N-formylanthranilic acid	3342-77-6	91624	HMDB0004089	C05653	101399
100004575	Amino Acid	Urea cycle; Arginine and Proline Metabolism	N2,N5-diacetylornithine	39825-23-5	8573834	HMDB0240345		65977
100004634	Amino Acid	Tyrosine Metabolism	3-methoxytyramine sulfate		21233674			54133459
100004635	Amino Acid	Methionine, Cysteine, SAM and Taurine Metabolism	methionine sulfone	820-10-0	63154	HMDB0062174		69961
100005350	Lipid	Lysophospholipid	1-linolenoyl-GPC (18:3)*			HMDB0010388	C04100
100005367	Xenobiotics	Food Component/Plant	N-acetylalliin
100005372	Lipid	Lysoplasmalogen	1-(1-enyl-oleoyl)-GPE (P-18:1)*
100005373	Amino Acid	Lysine Metabolism	fructosyllysine	21291-40-7	110281	HMDB0034879		9839580
100005383	Xenobiotics	Bacterial/Fungal	N-methylpipecolate	41447-17-0	9461516			11286529
100005384	Xenobiotics	Chemical	O-sulfo-L-tyrosine		448617	HMDB0155722		514186
100005389	Xenobiotics	Food Component/Plant	ferulic acid 4-sulfate	86321-29-1	4878542	HMDB0029200		6305574
100005391	Xenobiotics	Benzoate Metabolism	3-(3-hydroxyphenyl)propionate sulfate	86321-32-6	162993	HMDB0094710		187488
100005403	Lipid	Androgenic Steroids	etiocholanolone glucuronide	3602-09-3		HMDB0004484		270605
100005418	Lipid	Pregnenolone Steroids	17alpha-hydroxypregnanolone glucuronide
100005466	Amino Acid	Methionine, Cysteine, SAM and Taurine Metabolism	N-acetyltaurine		140553	HMDB0240253		159864
100005716	Lipid	Lysophospholipid	1-oleoyl-GPG (18:1)*		34999689	HMDB0240602
100005717	Lipid	Lysophospholipid	1-palmitoyl-GPG (16:0)*		2548639	HMDB0240601		3300276
100005814	Lipid	Endocannabinoid	N-linoleoyltaurine*					52922081
100005818	Xenobiotics	Food Component/Plant	N-acetyl-S-allyl-L-cysteine	23127-41-5	134378	HMDB0240543		152467
100005834	Lipid	Fatty Acid, Monohydroxy	9-hydroxystearate	25498-28-6	7844595	HMDB0061661		9570127
100005850	Amino Acid	Leucine, Isoleucine and Valine Metabolism	3-methylglutarylcarnitine (2)		113619	HMDB0000552		128145
100005864	Xenobiotics	Food Component/Plant	methyl glucopyranoside (alpha + beta)			HMDB0029965		445238,3036743,2108
100005946	Xenobiotics	Food Component/Plant	2-keto-3-deoxy-gluconate	17510-99-5	141630	HMDB0001353	C00204	161227
100005985	Lipid	Sphingomyelins	sphingomyelin (d18:2/14:0, d18:1/14:1)*			HMDB0240637,HMDB0240612
100005986	Lipid	Sphingomyelins	sphingomyelin (d18:1/24:1, d18:2/24:0)*	94359-13-4	24846874	HMDB0012107		44260126
100005996	Lipid	Fatty Acid Metabolism (Acyl Carnitine, Dicarboxylate)	octadecenedioylcarnitine (C18:1-DC)*	251981-06-3	28639201
100005998	Lipid	Fatty Acid Metabolism (Acyl Carnitine, Dicarboxylate)	octadecanedioylcarnitine (C18-DC)*	123233-50-1	28639203
100006005	Lipid	Androgenic Steroids	5alpha-androstan-3alpha,17beta-diol monosulfate (2)					121596225
100006051	Lipid	Fatty Acid Metabolism (Acyl Carnitine, Monounsaturated)	myristoleoylcarnitine (C14:1)*	889848-55-9	34999520	HMDB0240588		129691961
100006056	Amino Acid	Tyrosine Metabolism	N-formylphenylalanine	13200-85-6	663938	HMDB0240317		759256,7064571
100006082	Xenobiotics	Chemical	4-hydroxychlorothalonil	28343-61-5	31530	HMDB0240624		34217
100006089	Xenobiotics	Food Component/Plant	isoeugenol sulfate		157181			122198202
100006092	Amino Acid	Tyrosine Metabolism	tyramine O-sulfate	30223-92-8	134849	HMDB0006409		153005
100006098	Xenobiotics	Chemical	3-hydroxypyridine sulfate	1955-23-3	16232314
100006104	Amino Acid	Tyrosine Metabolism	m-tyramine sulfate	175727-14-7
100006105	Xenobiotics	Benzoate Metabolism	4-methylguaiacol sulfate	756760-43-7
100006108	Peptide	Acetylated Peptides	phenylacetylcarnitine	287108-21-8				101724840
100006115	Carbohydrate	Pentose Metabolism	arabonate/xylonate			HMDB0000539	C00502,C05411	122045,6602431
100006116	Xenobiotics	Benzoate Metabolism	methyl-4-hydroxybenzoate sulfate			HMDB0041646		10657183
100006126	Xenobiotics	Food Component/Plant	4-vinylguaiacol sulfate			HMDB0127980		53803570
100006129	Amino Acid	Tyrosine Metabolism	vanillactate	2475-56-1	141152	HMDB0000913		160637
100006171	Xenobiotics	Food Component/Plant	eugenol sulfate	95480-60-7	157181	HMDB0135245		180632
100006173	Lipid	Progestin Steroids	pregnanolone/allopregnanolone sulfate			HMDB0240591,HMDB0062782	C05480	31402,129699967
100006184	Xenobiotics	Chemical	2-methoxyresorcinol sulfate	1446269-78-8
100006191	Amino Acid	Tyrosine Metabolism	p-cresol glucuronide*	17680-99-8	135751	HMDB0011686		154035
100006203	Xenobiotics	Food Component/Plant	acesulfame	55589-62-3	33607	HMDB0033585		36573
100006205	Xenobiotics	Benzoate Metabolism	propyl 4-hydroxybenzoate	94-13-3	6907	HMDB0032574	D01422	7175
100006260	Xenobiotics	Chemical	6-hydroxyindole sulfate			HMDB0000682		122198196
100006262	Amino Acid	Tyrosine Metabolism	4-methoxyphenol sulfate	3233-60-1
100006264	Xenobiotics	Benzoate Metabolism	propyl 4-hydroxybenzoate sulfate	162338-10-5	48063224	HMDB0135261		131838881
100006271	Xenobiotics	Chemical	ethylparaben sulfate	162338-11-6				22908099
100006282	Xenobiotics	Food Component/Plant	umbelliferone sulfate	69526-88-1	114800	HMDB0240565		129659
100006290	Lipid	Sphingomyelins	sphingomyelin (d18:1/20:0, d16:1/22:0)*		23113477	HMDB0012102		44260124
100006292	Lipid	Sphingomyelins	sphingomyelin (d18:1/20:1, d18:2/20:0)*	222403-67-0		HMDB0240610,HMDB0240632
100006293	Lipid	Sphingomyelins	sphingomyelin (d18:1/20:2, d18:2/20:1, d16:1/22:2)*
100006294	Lipid	Sphingomyelins	behenoyl sphingomyelin (d18:1/22:0)*		24846873	HMDB0012103		44260125
100006295	Lipid	Sphingomyelins	sphingomyelin (d18:1/22:1, d18:2/22:0, d16:1/24:1)*		29368329	HMDB0012104
100006296	Lipid	Sphingomyelins	sphingomyelin (d18:1/22:2, d18:2/22:1, d16:1/24:2)*			HMDB0240670,HMDB0240672,HMDB0240669
100006298	Lipid	Sphingomyelins	lignoceroyl sphingomyelin (d18:1/24:0)	60037-60-7	24846875	HMDB0011697
100006314	Lipid	Sphingomyelins	sphingomyelin (d17:1/16:0, d18:1/15:0, d16:1/17:0)*	121999-58-4	28532779	HMDB0240617,HMDB0240608
100006361	Amino Acid	Tyrosine Metabolism	dopamine 3-O-sulfate		108936	HMDB0006275	C13690	122136
100006363	Xenobiotics	Food Component/Plant	daidzein sulfate (2)					12114465
100006367	Lipid	Fatty Acid, Monohydroxy	3-hydroxyhexanoate	10191-24-9	133518	HMDB0061652,HMDB0010718		151492
100006370	Lipid	Sterol	3beta-hydroxy-5-cholestenoate	6561-58-6		HMDB0012453	C17333	165511
100006373	Xenobiotics	Chemical	1,2,3-benzenetriol sulfate (1)
100006374	Xenobiotics	Chemical	1,2,3-benzenetriol sulfate (2)			HMDB0060018,HMDB0060016		92013662,54110629
100006375	Xenobiotics	Benzoate Metabolism	3-methoxycatechol sulfate (1)					129892430
100006378	Amino Acid	Tryptophan Metabolism	N-acetylkynurenine (2)			HMDB0240342		73817779
100006379	Amino Acid	Tryptophan Metabolism	C-glycosyltryptophan	180509-18-6	9157171	HMDB0240296		10981970
100006430	Carbohydrate	Pentose Metabolism	arabitol/xylitol			HMDB0001851,HMDB0000568,HMDB0002917	C00379,C00542,C01904	94154,6912
100006435	Carbohydrate	Aminosugar Metabolism	N-acetylglucosamine/N-acetylgalactosamine			HMDB0000212,HMDB0000215	C01074	439174,84265
100006614	Lipid	Fatty Acid Metabolism (Acyl Carnitine, Dicarboxylate)	adipoylcarnitine (C6-DC)		28540385	HMDB0061677		71296139
100006620	Lipid	Fatty Acid Metabolism (Acyl Carnitine, Medium Chain)	nonanoylcarnitine (C9)		28533402	HMDB0013288		91825642
100006627	Lipid	Fatty Acid Metabolism (Acyl Carnitine, Dicarboxylate)	suberoylcarnitine (C8-DC)
100006639	Lipid	Primary Bile Acid Metabolism	glycocholate sulfate
100006641	Lipid	Primary Bile Acid Metabolism	glycochenodeoxycholate 3-sulfate			HMDB0002409,HMDB0002496,HMDB0002497		21116917,21125002,11954205
100006642	Lipid	Secondary Bile Acid Metabolism	glycodeoxycholate 3-sulfate					101602538
100006644	Lipid	Secondary Bile Acid Metabolism	taurodeoxycholic acid 3-sulfate
100006651	Xenobiotics	Food Component/Plant	trans-3,4-methyleneheptanoate
100006679	Amino Acid	Tyrosine Metabolism	phenol glucuronide	17685-05-1	78692	HMDB0060014		87235
100006726	Lipid	Endocannabinoid	linoleoyl ethanolamide	68171-52-8	4446566	HMDB0012252		5283446
100008903	Lipid	Phosphatidylcholine (PC)	1,2-dilinoleoyl-GPC (18:2/18:2)	998-06-1	4450312	HMDB0008138		5288075
100008904	Lipid	Phosphatidylcholine (PC)	1-stearoyl-2-oleoyl-GPC (18:0/18:1)	56421-10-4	24766704	HMDB0008038		24778825
100008914	Lipid	Phosphatidylcholine (PC)	1-palmitoyl-2-arachidonoyl-GPC (16:0/20:4n6)	35418-58-7	8923140	HMDB0007982	C05208	10747814
100008915	Lipid	Phosphatidylcholine (PC)	1-palmitoyl-2-docosahexaenoyl-GPC (16:0/22:6)	59403-54-2	4946007	HMDB0007991		6441886
100008916	Lipid	Phosphatidylcholine (PC)	1-stearoyl-2-docosahexaenoyl-GPC (18:0/22:6)	59403-52-0		HMDB0008057		24778876
100008919	Lipid	Plasmalogen	1-(1-enyl-stearoyl)-2-oleoyl-GPE (P-18:0/18:1)	144371-68-6	24769260	HMDB0011375		42607457
100008920	Lipid	Sphingomyelins	sphingomyelin (d18:1/17:0, d17:1/18:0, d19:1/16:0)	121999-64-2		HMDB0240620,HMDB0240609,HMDB0240622		46891763
100008921	Lipid	Phosphatidylcholine (PC)	1-palmitoyl-2-stearoyl-GPC (16:0/18:0)	59403-51-9	24766643	HMDB0007970	C03889	24778686
100008928	Amino Acid	Glutathione Metabolism	2-hydroxybutyrate/2-hydroxyisobutyrate			HMDB0000729,HMDB00008	C21297,C05984	440864,4277439
100008930	Lipid	Long Chain Monounsaturated Fatty Acid	oleate/vaccenate (18:1)			HMDB0003231,HMDB0000573,HMDB0240219,HMDB0000207	C21944,C08367,C01712,C00712	5282761,637517,5281127,445639
100008933	Lipid	Fatty Acid, Monohydroxy	3-hydroxystearate	45261-96-9	4446034	HMDB10737		5282907
100008934	Lipid	Fatty Acid, Monohydroxy	2-hydroxylaurate	2984-55-6	88259			97783
100008954	Lipid	Dihydrosphingomyelins	palmitoyl dihydrosphingomyelin (d18:0/16:0)*		8115586	HMDB0010168		9939965
100008955	Lipid	Sphingomyelins	tricosanoyl sphingomyelin (d18:1/23:0)*			HMDB0012105
100008956	Lipid	Sphingomyelins	sphingomyelin (d18:2/23:0, d18:1/23:1, d17:1/24:1)*			HMDB0240634,HMDB0011696,HMDB0240614		134757653
100008957	Lipid	Sphingomyelins	sphingomyelin (d18:2/24:1, d18:1/24:2)*			HMDB0240636,HMDB0240615		85336023
100008976	Lipid	Phosphatidylethanolamine (PE)	1-stearoyl-2-linoleoyl-GPE (18:0/18:2)*		7825699	HMDB0008994		9546749
100008977	Lipid	Phosphatidylethanolamine (PE)	1-stearoyl-2-arachidonoyl-GPE (18:0/20:4)		4451158	HMDB0009003	C05210	5289133
100008980	Lipid	Phosphatidylcholine (PC)	1-stearoyl-2-linoleoyl-GPC (18:0/18:2)*			HMDB0008039		6441487
100008984	Lipid	Phosphatidylcholine (PC)	1-palmitoyl-2-palmitoleoyl-GPC (16:0/16:1)*			HMDB0007969		6443788
100008990	Lipid	Phosphatidylethanolamine (PE)	1-palmitoyl-2-arachidonoyl-GPE (16:0/20:4)*		7825750	HMDB0005323	C05210	9546800
100008991	Lipid	Phosphatidylethanolamine (PE)	1-palmitoyl-2-docosahexaenoyl-GPE (16:0/22:6)*		7825749	HMDB0008946		9546799
100008992	Lipid	Phosphatidylethanolamine (PE)	1-stearoyl-2-docosahexaenoyl-GPE (18:0/22:6)*		7825748	HMDB0009012		9546798
100008993	Lipid	Phosphatidylinositol (PI)	1-palmitoyl-2-arachidonoyl-GPI (16:0/20:4)*		24767674	HMDB0009789
100008994	Lipid	Phosphatidylinositol (PI)	1-stearoyl-2-linoleoyl-GPI (18:0/18:2)		24767694	HMDB0009809
100008998	Cofactors and Vitamins	Tocopherol Metabolism	gamma-tocopherol/beta-tocopherol			HMDB0006335,HMDB0001492	C14152,C02483
100008999	Lipid	Plasmalogen	1-(1-enyl-stearoyl)-2-arachidonoyl-GPE (P-18:0/20:4)*		7826008	HMDB0005779		9547058
100009002	Lipid	Plasmalogen	1-(1-enyl-palmitoyl)-2-arachidonoyl-GPE (P-16:0/20:4)*		24769238	HMDB0011352		52925126
100009005	Lipid	Plasmalogen	1-(1-enyl-palmitoyl)-2-oleoyl-GPE (P-16:0/18:1)*		24769228	HMDB0011342		52925128
100009007	Lipid	Plasmalogen	1-(1-enyl-palmitoyl)-2-oleoyl-GPC (P-16:0/18:1)*			HMDB0007996		34779384
100009009	Lipid	Plasmalogen	1-(1-enyl-palmitoyl)-2-linoleoyl-GPC (P-16:0/18:2)*		24767486	HMDB0011211		24779386
100009014	Lipid	Plasmalogen	1-(1-enyl-palmitoyl)-2-arachidonoyl-GPC (P-16:0/20:4)*		24767495	HMDB0011220
100009025	Lipid	Sphingomyelins	sphingomyelin (d18:1/21:0, d17:1/22:0, d16:1/23:0)*			HMDB0240619,HMDB0240611,HMDB0240621
100009026	Lipid	Dihydrosphingomyelins	behenoyl dihydrosphingomyelin (d18:0/22:0)*		24846880	HMDB0012091		44260132
100009027	Lipid	Dihydrosphingomyelins	sphingomyelin (d18:0/18:0, d19:0/17:0)*		24846878	HMDB0012087		44260130
100009030	Lipid	Lactosylceramides (LCER)	lactosyl-N-palmitoyl-sphingosine (d18:1/16:0)	4201-62-1		HMDB0006750		53477895
100009038	Lipid	Dihydrosphingomyelins	myristoyl dihydrosphingomyelin (d18:0/14:0)*		24846886	HMDB0012085		44260138
100009066	Lipid	Phosphatidylinositol (PI)	1-palmitoyl-2-oleoyl-GPI (16:0/18:1)*		24767668	HMDB0009783		71296232
100009069	Lipid	Plasmalogen	1-(1-enyl-palmitoyl)-2-linoleoyl-GPE (P-16:0/18:2)*		24769229	HMDB0011343		52925127
100009078	Lipid	Phosphatidylethanolamine (PE)	1-oleoyl-2-linoleoyl-GPE (18:1/18:2)*		7825703	HMDB0005349		9546753
100009082	Lipid	Lysophospholipid	1-linoleoyl-GPA (18:2)*		24766514	HMDB0007856
100009130	Lipid	Phosphatidylcholine (PC)	1-oleoyl-2-docosahexaenoyl-GPC (18:1/22:6)*		24766785	HMDB0008123		24778955
100009131	Lipid	Phosphatidylcholine (PC)	1-linoleoyl-2-arachidonoyl-GPC (18:2/20:4n6)*		24766809	HMDB0008147	C05208	24778979
100009139	Lipid	Phosphatidylcholine (PC)	1-myristoyl-2-arachidonoyl-GPC (14:0/20:4)*		24766559	HMDB0007883		24778634
100009160	Lipid	Plasmalogen	1-(1-enyl-palmitoyl)-2-palmitoleoyl-GPC (P-16:0/16:1)*		24767482	HMDB0011207		52923882
100009162	Lipid	Plasmalogen	1-(1-enyl-palmitoyl)-2-palmitoyl-GPC (P-16:0/16:0)*		9322076	HMDB0011206		11146967
100009181	Lipid	Phosphatidylinositol (PI)	1-stearoyl-2-oleoyl-GPI (18:0/18:1)*			HMDB0240667
100009217	Lipid	Phosphatidylethanolamine (PE)	1,2-dilinoleoyl-GPE (18:2/18:2)*		7825762	HMDB0009093		9546812
100009220	Lipid	Phosphatidylethanolamine (PE)	1-oleoyl-2-docosahexaenoyl-GPE (18:1/22:6)*		24768542	HMDB0009078		52922113
100009225	Lipid	Plasmalogen	1-(1-enyl-stearoyl)-2-linoleoyl-GPE (P-18:0/18:2)*		24769261	HMDB0011376
100009227	Lipid	Lysophospholipid	1-linoleoyl-GPG (18:2)*			HMDB0240600
100009232	Xenobiotics	Chemical	thioproline	34592-47-4	84120	HMDB0062164		93176
100009233	Lipid	Fatty Acid Metabolism (Acyl Choline)	palmitoylcholine		133731	HMDB0240592		151731
100009264	Lipid	Primary Bile Acid Metabolism	glycochenodeoxycholate glucuronide (1)			HMDB0002579		44263370
100009271	Lipid	Fatty Acid Metabolism (Acyl Carnitine, Hydroxy)	(S)-3-hydroxybutyrylcarnitine			HMDB0013127		71464477
100009272	Lipid	Hexosylceramides (HCER)	glycosyl-N-palmitoyl-sphingosine (d18:1/16:0)
100009329	Cofactors and Vitamins	Ascorbate and Aldarate Metabolism	ascorbic acid 2-sulfate		77998	HMDB0060649		54676864
100009331	Lipid	Fatty Acid Metabolism (Acyl Choline)	oleoylcholine			HMDB0240596		59040790
100009332	Lipid	Fatty Acid Metabolism (Acyl Choline)	arachidonoylcholine			HMDB0240583		122198216
100009337	Xenobiotics	Food Component/Plant	caffeic acid sulfate		30777608	HMDB0041708		21668705
100009343	Lipid	Phosphatidylcholine (PC)	1-linoleoyl-2-linolenoyl-GPC (18:2/18:3)*		24766802	HMDB0008141		52922731
100009345	Lipid	Phosphatidylcholine (PC)	1-palmitoleoyl-2-linolenoyl-GPC (16:1/18:3)*		24766677	HMDB0008008		52922452
100009394	Lipid	Long Chain Polyunsaturated Fatty Acid (n3 and n6)	hexadecadienoate (16:2n6)	28290-73-5	13628094	HMDB0000477		13932172
100009406	Lipid	Fatty Acid Metabolism (Acyl Carnitine, Monounsaturated)	palmitoleoylcarnitine (C16:1)*		28639183	HMDB0013207		71464547
100009407	Lipid	Fatty Acid Metabolism (Acyl Carnitine, Dicarboxylate)	pimeloylcarnitine/3-methyladipoylcarnitine (C7-DC)
100010850	Peptide	Acetylated Peptides	4-hydroxyphenylacetylglutamine
100010895	Nucleotide	Pyrimidine Metabolism, Cytidine containing	2'-O-methylcytidine	2140-72-9	133067			150971
100010896	Nucleotide	Pyrimidine Metabolism, Uracil containing	2'-O-methyluridine	2140-76-3	92343	HMDB0240328		102212
100010901	Peptide	Gamma-glutamyl Amino Acid	gamma-glutamyl-alpha-lysine		58747			65254
100010922	Lipid	Diacylglycerol	linoleoyl-arachidonoyl-glycerol (18:2/20:4) [1]*			HMDB0007257		9543796
100010923	Lipid	Diacylglycerol	linoleoyl-arachidonoyl-glycerol (18:2/20:4) [2]*			HMDB0007257		9543796
100010941	Lipid	Diacylglycerol	linoleoyl-linoleoyl-glycerol (18:2/18:2) [1]*			HMDB0007248		9543729
100010942	Lipid	Diacylglycerol	linoleoyl-linoleoyl-glycerol (18:2/18:2) [2]*			HMDB0007248		9543729
100010955	Xenobiotics	Chemical	perfluorooctanesulfonate (PFOS)	1763-23-1	67068	HMDB0059586	C18142	74483
100015609	Lipid	Ceramides	N-palmitoyl-sphingadienine (d18:2/16:0)*			HMDB0240686
100015620	Lipid	Lactosylceramides (LCER)	lactosyl-N-nervonoyl-sphingosine (d18:1/24:1)*		24846896	HMDB0004872
100015624	Lipid	Ceramides	N-behenoyl-sphingadienine (d18:2/22:0)*
100015637	Lipid	Fatty Acid, Monohydroxy	2-hydroxybehenate		167899	HMDB0061660		193484
100015638	Lipid	Fatty Acid, Monohydroxy	2-hydroxynervonate*		4472208			5312783
100015641	Lipid	Endocannabinoid	N-oleoylserine		21466990			44190514
100015744	Lipid	Ceramides	ceramide (d18:2/24:1, d18:1/24:2)*			HMDB0240679,HMDB0240680
100015745	Lipid	Hexosylceramides (HCER)	glycosyl ceramide (d18:2/24:1, d18:1/24:2)*
100015752	Lipid	Hexosylceramides (HCER)	glycosyl-N-(2-hydroxynervonoyl)-sphingosine (d18:1/24:1(2OH))*
100015755	Lipid	Ceramides	ceramide (d18:1/20:0, d16:1/22:0, d20:1/18:0)*			HMDB0240684,HMDB0240682,HMDB0004951
100015760	Lipid	Fatty Acid Metabolism (Acyl Choline)	linoleoylcholine*			HMDB0013213		53481656
100015786	Lipid	Dihydrosphingomyelins	sphingomyelin (d18:0/20:0, d16:0/22:0)*			HMDB0012090
100015787	Lipid	Sphingomyelins	sphingomyelin (d18:1/19:0, d19:1/18:0)*
100015788	Lipid	Sphingomyelins	sphingomyelin (d18:2/18:1)*			HMDB0001348		52931155
100015789	Lipid	Sphingomyelins	sphingomyelin (d18:2/24:2)*			HMDB0240644
100015790	Lipid	Sphingomyelins	sphingomyelin (d18:2/21:0, d16:2/23:0)*			HMDB0240676
100015791	Lipid	Sphingomyelins	sphingomyelin (d18:2/23:1)*			HMDB0240668
100015792	Lipid	Sphingomyelins	sphingomyelin (d18:1/25:0, d19:0/24:1, d20:1/23:0, d19:1/24:0)*		24846885	HMDB0240675,HMDB0240674,HMDB0240673,HMDB0240671
100015793	Lipid	Sphingomyelins	sphingomyelin (d17:2/16:0, d18:2/15:0)*			HMDB0240677
100015831	Lipid	Fatty Acid Metabolism (Acyl Carnitine, Polyunsaturated)	linolenoylcarnitine (C18:3)*
100015832	Lipid	Fatty Acid Metabolism (Acyl Carnitine, Long Chain Saturated)	behenoylcarnitine (C22)*		28639204	HMDB0062468		71464577
100015833	Lipid	Fatty Acid Metabolism (Acyl Carnitine, Long Chain Saturated)	arachidoylcarnitine (C20)*		28639199	HMDB0006460		53477833
100015834	Lipid	Fatty Acid Metabolism (Acyl Carnitine, Long Chain Saturated)	lignoceroylcarnitine (C24)*			HMDB0240665
100015835	Lipid	Fatty Acid Metabolism (Acyl Carnitine, Long Chain Saturated)	cerotoylcarnitine (C26)*		35015992	HMDB0006347		53477828
100015836	Lipid	Fatty Acid Metabolism (Acyl Carnitine, Monounsaturated)	ximenoylcarnitine (C26:1)*
100015837	Lipid	Fatty Acid Metabolism (Acyl Carnitine, Polyunsaturated)	arachidonoylcarnitine (C20:4)			HMDB0006455		136212424
100015838	Lipid	Fatty Acid Metabolism (Acyl Carnitine, Monounsaturated)	eicosenoylcarnitine (C20:1)*
100015839	Lipid	Fatty Acid Metabolism (Acyl Carnitine, Polyunsaturated)	dihomo-linoleoylcarnitine (C20:2)*
100015840	Lipid	Fatty Acid Metabolism (Acyl Carnitine, Polyunsaturated)	dihomo-linolenoylcarnitine (C20:3n3 or 6)*
100015841	Lipid	Fatty Acid Metabolism (Acyl Carnitine, Monounsaturated)	erucoylcarnitine (C22:1)*
100015846	Lipid	Fatty Acid Metabolism (Acyl Carnitine, Monounsaturated)	nervonoylcarnitine (C24:1)*			HMDB0006509
100015878	Xenobiotics	Drug - Antibiotic	metronidazole	73334-05-1	4029	HMDB0015052	DG00006,C07203,D00409	4173
100015882	Lipid	Hexosylceramides (HCER)	glycosyl ceramide (d18:1/20:0, d16:1/22:0)*
100015962	Amino Acid	Lysine Metabolism	N,N,N-trimethyl-5-aminovalerate		34236878			14274897
100015965	Xenobiotics	Food Component/Plant	ethyl alpha-glucopyranoside	34625-23-5	378664	HMDB0029968		11127487
100015966	Cofactors and Vitamins	Vitamin A Metabolism	carotene diol (1)
100015967	Cofactors and Vitamins	Vitamin A Metabolism	carotene diol (2)
100015968	Cofactors and Vitamins	Vitamin A Metabolism	carotene diol (3)
100015971	Lipid	Corticosteroids	cortolone glucuronide (1)
100016069	Lipid	Fatty Acid Metabolism (Acyl Carnitine, Monounsaturated)	5-dodecenoylcarnitine (C12:1)			HMDB13326		91825571
100016110	Lipid	Fatty Acid Metabolism (Acyl Glycine)	2-butenoylglycine	71428-89-2	4877902			6303498
100019794	Lipid	Fatty Acid, Dicarboxylate	hydroxy-CMPF*
100019801	Lipid	Fatty Acid Metabolism (Acyl Carnitine, Hydroxy)	3-hydroxyoleoylcarnitine		48061587			129637446
100019884	Lipid	Fatty Acid Metabolism (Acyl Glycine)	trans-2-hexenoylglycine		25033670
100019892	Lipid	Fatty Acid, Monohydroxy	2-hydroxyarachidate*		4395406			5225199
100019968	Carbohydrate	Pentose Metabolism	lyxonate			HMDB0060255
100019972	Lipid	Fatty Acid, Dicarboxylate	dodecenedioate (C12:1-DC)*			HMDB0000933		5283028
100019975	Lipid	Fatty Acid, Dicarboxylate	hexadecenedioate (C16:1-DC)*
100019978	Lipid	Fatty Acid, Dicarboxylate	octadecenedioate (C18:1-DC)					9543674
100019981	Lipid	Fatty Acid, Dicarboxylate	heptenedioate (C7:1-DC)*
100019982	Lipid	Fatty Acid, Dicarboxylate	octadecadienedioate (C18:2-DC)*
100019990	Partially Characterized Molecules	Partially Characterized Molecules	glucuronide of C10H18O2 (1)*
100020004	Lipid	Fatty Acid, Dicarboxylate	3-carboxy-4-methyl-5-pentyl-2-furanpropionate (3-CMPFP)**		168762	HMDB0061643		194501
100020006	Xenobiotics	Chemical	methylnaphthyl sulfate (2)*
100020014	Partially Characterized Molecules	Partially Characterized Molecules	glucuronide of C10H18O2 (7)*
100020203	Xenobiotics	Food Component/Plant	3-hydroxystachydrine*		391002		C10151	46173781
100020204	Lipid	Fatty Acid, Amino	N-acetyl-2-aminooctanoate*		86248	HMDB0059745		95555
100020205	Amino Acid	Alanine and Aspartate Metabolism	hydroxyasparagine**		88149	HMDB32332	C20631	15991574
100020207	Xenobiotics	Food Component/Plant	genistein sulfate*
100020208	Xenobiotics	Chemical	perfluorooctanoate (PFOA)		9180	HMDB0059587		9554
100020211	Lipid	Fatty Acid Metabolism (Acyl Glycine)	3-hydroxybutyroylglycine**
100020214	Lipid	Primary Bile Acid Metabolism	glyco-beta-muricholate**
100020215	Amino Acid	Urea cycle; Arginine and Proline Metabolism	N-methylhydroxyproline**					9860390
100020217	Amino Acid	Urea cycle; Arginine and Proline Metabolism	N,N,N-trimethyl-alanylproline betaine (TMAP)			HMDB0240365
100020219	Xenobiotics	Food Component/Plant	3-formylindole	487-89-8	9838	HMDB29737	C08493	10256
100020241	Peptide	Gamma-glutamyl Amino Acid	gamma-glutamylcitrulline*
100020253	Partially Characterized Molecules	Partially Characterized Molecules	glycine conjugate of C10H12O2*
100020254	Partially Characterized Molecules	Partially Characterized Molecules	glycine conjugate of C10H14O2 (1)*
100020259	Partially Characterized Molecules	Partially Characterized Molecules	glutamine conjugate of C7H12O2*
100020261	Partially Characterized Molecules	Partially Characterized Molecules	glutamine conjugate of C6H10O2 (1)*
100020262	Partially Characterized Molecules	Partially Characterized Molecules	glutamine conjugate of C6H10O2 (2)*
100020272	Xenobiotics	Food Component/Plant	dihydroferulic acid sulfate		162994	HMDB0041724		187489
100020276	Lipid	Sphingomyelins	sphingomyelin (d17:1/14:0, d16:1/15:0)*
100020343	Lipid	Long Chain Polyunsaturated Fatty Acid (n3 and n6)	tetradecadienoate (14:2)*	39039-37-7	4471834	HMDB0000560		5312409
100020361	Amino Acid	Urea cycle; Arginine and Proline Metabolism	3-amino-2-piperidone	1892-22-4	4371576	HMDB0000323		5200225
100020371	Amino Acid	Alanine and Aspartate Metabolism	N,N-dimethylalanine	2812-31-9	4589713			5488191
100020372	Xenobiotics	Food Component/Plant	3-indoleglyoxylic acid	1477-49-2	66497			73863
100020377	Xenobiotics	Food Component/Plant	ethyl beta-glucopyranoside		108559	HMDB0029968		121667
100020378	Lipid	Fatty Acid, Dicarboxylate	2-hydroxysebacate	103963-71-9	113866	HMDB0000424		128458
100020409	Cofactors and Vitamins	Ascorbate and Aldarate Metabolism	ascorbic acid 3-sulfate*		9600241			11425365
100020414	Amino Acid	Tryptophan Metabolism	6-bromotryptophan					9856996
100020416	Cofactors and Vitamins	Tocopherol Metabolism	delta-CEHC	84599-16-6	9710906			35027084
100020417	Amino Acid	Lysine Metabolism	N6,N6-dimethyllysine	2259-86-1	167778	HMDB0013287	C05545	193344
100020478	Lipid	Fatty Acid, Dicarboxylate	dodecadienoate (12:2)*					25480
100020480	Cofactors and Vitamins	Tocopherol Metabolism	gamma-CEHC sulfate
100020483	Cofactors and Vitamins	Tocopherol Metabolism	delta-CEHC glucuronide
100020487	Amino Acid	Polyamine Metabolism	N-acetyl-isoputreanine					131802901
100020492	Xenobiotics	Food Component/Plant	glucuronide of piperine metabolite C17H21NO3 (4)*
100020496	Xenobiotics	Food Component/Plant	sulfate of piperine metabolite C16H19NO3 (2)*
100020497	Xenobiotics	Food Component/Plant	sulfate of piperine metabolite C16H19NO3 (3)*
100020502	Xenobiotics	Food Component/Plant	sulfate of piperine metabolite C18H21NO3 (1)*
100020504	Xenobiotics	Food Component/Plant	sulfate of piperine metabolite C18H21NO3 (3)*
100020515	Xenobiotics	Chemical	2-naphthol sulfate		67020			74428
100020519	Xenobiotics	Food Component/Plant	(2,4 or 2,5)-dimethylphenol sulfate
100020536	Xenobiotics	Benzoate Metabolism	4-ethylcatechol sulfate
100020541	Lipid	Androgenic Steroids	11beta-hydroxyandrosterone glucuronide			HMDB0010351
100020542	Lipid	Androgenic Steroids	11beta-hydroxyetiocholanolone glucuronide*	17181-15-6
100020545	Amino Acid	Lysine Metabolism	N2-acetyl,N6,N6-dimethyllysine
100020546	Amino Acid	Lysine Metabolism	N2-acetyl,N6-methyllysine
100020550	Lipid	Secondary Bile Acid Metabolism	deoxycholic acid glucuronide
100020578	Xenobiotics	Benzoate Metabolism	4-allylcatechol sulfate
100020585	Xenobiotics	Tobacco Metabolite	2-hydroxyfluorene sulfate
100020622	Xenobiotics	Food Component/Plant	methyl vanillate sulfate
100020819	Lipid	Secondary Bile Acid Metabolism	glycoursodeoxycholic acid sulfate (1)
100020822	Xenobiotics	Food Component/Plant	dihydrocaffeate sulfate (2)
100020823	Lipid	Secondary Bile Acid Metabolism	lithocholate sulfate (1)					451489
100020825	Lipid	Fatty Acid Metabolism (Acyl Carnitine, Hydroxy)	3-hydroxyhexanoylcarnitine (1)
100020827	Xenobiotics	Drug - Analgesics, Anesthetics	3-(methylthio)acetaminophen sulfate*
100020833	Amino Acid	Leucine, Isoleucine and Valine Metabolism	2-ketocaprylate	328-51-8	60921	HMDB13211		67600
100020837	Xenobiotics	Drug - Topical Agents	2,6-dihydroxybenzoic acid	303-07-1	8974	HMDB0013676		9338
100020844	Lipid	Secondary Bile Acid Metabolism	tauroursodeoxycholic acid sulfate (1)
100020851	Xenobiotics	Food Component/Plant	3-ethylcatechol sulfate (1)
100020853	Xenobiotics	Food Component/Plant	4-acetylcatechol sulfate (1)
100020893	Amino Acid	Methionine, Cysteine, SAM and Taurine Metabolism	2,3-dihydroxy-5-methylthio-4-pentenoate (DMTPA)*			HMDB0240388
100020975	Xenobiotics	Chemical	3-hydroxy-2-methylpyridine sulfate
100021000	Lipid	Sphingomyelins	hydroxypalmitoyl sphingomyelin (d18:1/16:0(OH))**
100021093	Lipid	Secondary Bile Acid Metabolism	taurochenodeoxycholic acid 3-sulfate		24850141	HMDB0002486		52931550
100021100	Lipid	Fatty Acid, Dicarboxylate	tetradecadienedioate (C14:2-DC)*					86018718
100021103	Lipid	Pregnenolone Steroids	pregnenetriol sulfate*					129671303
100021104	Lipid	Pregnenolone Steroids	pregnenetriol disulfate*
100021105	Lipid	Fatty Acid, Dicarboxylate	eicosenedioate (C20:1-DC)*
100021123	Amino Acid	Lysine Metabolism	hydroxy-N6,N6,N6-trimethyllysine*
100021131	Lipid	Fatty Acid Metabolism (Acyl Carnitine, Monounsaturated)	undecenoylcarnitine (C11:1)
100021136	Lipid	Fatty Acid Metabolism (Acyl Carnitine, Monounsaturated)	3-decenoylcarnitine
100021141	Lipid	Fatty Acid Metabolism (Acyl Carnitine, Hydroxy)	3-hydroxydecanoylcarnitine		59664325	HMDB0061636		121454166
100021162	Lipid	Ceramide PEs	palmitoyl-sphingosine-phosphoethanolamine (d18:1/16:0)
100021198	Lipid	Fatty Acid Metabolism (Acyl Glycine)	picolinoylglycine	5616-29-5	9963296	HMDB0059766		11788622
100021208	Xenobiotics	Benzoate Metabolism	4-vinylcatechol sulfate
100021220	Amino Acid	Methionine, Cysteine, SAM and Taurine Metabolism	succinoyltaurine		20509456
100021324	Xenobiotics	Chemical	3,5-dichloro-2,6-dihydroxybenzoic acid		24339141			24721632
100021329	Xenobiotics	Food Component/Plant	(S)-a-amino-omega-caprolactam	21568-87-6	388871		C02837	440599
100021331	Partially Characterized Molecules	Partially Characterized Molecules	metabolonic lactone sulfate
100021363	Xenobiotics	Food Component/Plant	vanillic acid glycine		2340857	HMDB0060026		3083688
100021372	Amino Acid	Methionine, Cysteine, SAM and Taurine Metabolism	2-hydroxy-4-(methylthio)butanoic acid	583-91-5		HMDB0037115		11427
100021374	Lipid	Fatty Acid, Dicarboxylate	branched chain 14:0 dicarboxylic acid**
100021467	Partially Characterized Molecules	Partially Characterized Molecules	pentose acid*			HMDB0000892	C00803	7991
100021478	Amino Acid	Histidine Metabolism	1-methyl-5-imidazolelactate	2022510-60-5	65563369
100021502	Lipid	Medium Chain Fatty Acid	(2 or 3)-decenoate (10:1n7 or n8)
100021530	Amino Acid	Methionine, Cysteine, SAM and Taurine Metabolism	S-carboxyethylcysteine	4033-46-9	19955529
100021538	Xenobiotics	Chemical	dibutyl sulfosuccinate	5144-51-4	375186			423891
100021647	Lipid	Secondary Bile Acid Metabolism	isoursodeoxycholate sulfate (1)
100021650	Lipid	Primary Bile Acid Metabolism	chenodeoxycholic acid sulfate (1)			HMDB0002522		21252308
100021666	Partially Characterized Molecules	Partially Characterized Molecules	branched-chain, straight-chain, or cyclopropyl 10:1 fatty acid (1)*
100021707	Xenobiotics	Chemical	3-bromo-5-chloro-2,6-dihydroxybenzoic acid*					134581543
100021709	Partially Characterized Molecules	Partially Characterized Molecules	branched-chain, straight-chain, or cyclopropyl 12:1 fatty acid*
100021711	Lipid	Fatty Acid, Dicarboxylate	decadienedioic acid (C10:2-DC)**					17789717
100021712	Lipid	Secondary Bile Acid Metabolism	deoxycholic acid 12-sulfate*
100021726	Partially Characterized Molecules	Partially Characterized Molecules	GlcNAc sulfate conjugate of C21H34O2 steroid**
100021727	Lipid	Fatty Acid, Branched	cis-3,4-methyleneheptanoate
100021728	Lipid	Fatty Acid Metabolism (Acyl Carnitine, Medium Chain)	cis-3,4-methyleneheptanoylcarnitine
100021748	Xenobiotics	Drug - Metabolic	febuxostat	144060-53-7	118173		DG02878,D01206	134018
100021760	Amino Acid	Lysine Metabolism	N-acetyl-2-aminoadipate		392027		C12986	443992
100021990	Lipid	Fatty Acid Metabolism (Acyl Carnitine, Hydroxy)	3-hydroxyoctanoylcarnitine (1)
100021991	Lipid	Fatty Acid Metabolism (Acyl Carnitine, Hydroxy)	3-hydroxyoctanoylcarnitine (2)
100021992	Lipid	Fatty Acid Metabolism (Acyl Glycine)	cis-3,4-methyleneheptanoylglycine
100022003	Partially Characterized Molecules	Partially Characterized Molecules	bilirubin degradation product, C16H18N2O5 (1)**
100022004	Partially Characterized Molecules	Partially Characterized Molecules	bilirubin degradation product, C16H18N2O5 (2)**
100022005	Partially Characterized Molecules	Partially Characterized Molecules	bilirubin degradation product, C17H18N2O4 (1)**
100022006	Partially Characterized Molecules	Partially Characterized Molecules	bilirubin degradation product, C17H18N2O4 (2)**
100022007	Partially Characterized Molecules	Partially Characterized Molecules	bilirubin degradation product, C17H18N2O4 (3)**
100022008	Partially Characterized Molecules	Partially Characterized Molecules	bilirubin degradation product, C17H20N2O5 (1)**
100022009	Partially Characterized Molecules	Partially Characterized Molecules	bilirubin degradation product, C17H20N2O5 (2)**
100022013	Lipid	Corticosteroids	tetrahydrocortisol glucuronide
100022014	Partially Characterized Molecules	Partially Characterized Molecules	bilirubin degradation product, C16H18N2O5 (3)**
100022015	Partially Characterized Molecules	Partially Characterized Molecules	bilirubin degradation product, C16H18N2O5 (4)**
100022041	Peptide	Modified Peptides	N,N-dimethyl-pro-pro
100022120	Amino Acid	Tryptophan Metabolism	oxindolylalanine					20977764
100022127	Lipid	Corticosteroids	tetrahydrocortisone glucuronide (5)
100022172	Xenobiotics	Chemical	perfluorohexanesulfonate (PFHxS)	355-46-4		HMDB0094700

## Sheet: sample data information
PARENT_SAMPLE_NAME	GROUP_ID_2	GROUP__ID	INFECTION	PATIENT_NUMBER	TIME POINTS
DN-DIAN-11767	ATB-DILI_T1	ATB-DILI	TB	A1	1
DN-DIAN-11768	ATB-DILI_T2	ATB-DILI	TB	A1	2
DN-DIAN-11769	ATB-DILI_T3	ATB-DILI	TB	A1	3
DN-DIAN-11770	ATB-DILI_T4	ATB-DILI	TB	A1	4
DN-DIAN-11771	ATB-DILI_T1	ATB-DILI	TB	A2	1
DN-DIAN-11772	ATB-DILI_T2	ATB-DILI	TB	A2	2
DN-DIAN-11773	ATB-DILI_T3	ATB-DILI	TB	A2	3
DN-DIAN-11774	ATB-DILI_T4	ATB-DILI	TB	A2	4
DN-DIAN-11775	ATB-DILI_T5	ATB-DILI	TB	A2	5
DN-DIAN-11776	ATB-DILI_T1	ATB-DILI	TB	A3	1
DN-DIAN-11777	ATB-DILI_T2	ATB-DILI	TB	A3	2
DN-DIAN-11778	ATB-DILI_T3	ATB-DILI	TB	A3	3
DN-DIAN-11779	ATB-DILI_T4	ATB-DILI	TB	A3	4
DN-DIAN-11780	ATB-DILI_T5	ATB-DILI	TB	A3	5
DN-DIAN-11781	ATB-Ctrl_T1	ATB-Ctrl	TB	B1	1
DN-DIAN-11782	ATB-Ctrl_T2	ATB-Ctrl	TB	B1	2
DN-DIAN-11783	ATB-Ctrl_T3	ATB-Ctrl	TB	B1	3
DN-DIAN-11784	ATB-Ctrl_T4	ATB-Ctrl	TB	B1	4
DN-DIAN-11785	ATB-Ctrl_T5	ATB-Ctrl	TB	B1	5
DN-DIAN-11786	ATB-Ctrl_T1	ATB-Ctrl	TB	B2	1
DN-DIAN-11787	ATB-Ctrl_T2	ATB-Ctrl	TB	B2	2
DN-DIAN-11788	ATB-Ctrl_T3	ATB-Ctrl	TB	B2	3
DN-DIAN-11789	ATB-Ctrl_T4	ATB-Ctrl	TB	B2	4
DN-DIAN-11790	ATB-Ctrl_T5	ATB-Ctrl	TB	B2	5
DN-DIAN-11791	ATB-Ctrl_T1	ATB-Ctrl	TB	B3	1
DN-DIAN-11792	ATB-Ctrl_T2	ATB-Ctrl	TB	B3	2
DN-DIAN-11793	ATB-Ctrl_T3	ATB-Ctrl	TB	B3	3
DN-DIAN-11794	ATB-Ctrl_T4	ATB-Ctrl	TB	B3	4
DN-DIAN-11795	ATB-Ctrl_T5	ATB-Ctrl	TB	B3	5
DN-DIAN-11796	HC	HC	No	C1
DN-DIAN-11797	HC	HC	No	C2
DN-DIAN-11798	HC	HC	No	C3
DN-DIAN-11799	HC	HC	No	C4
DN-DIAN-11800	HC	HC	No	C5
DN-DIAN-11801	HC	HC	No	C6
DN-DIAN-11802	ATB-DILI_T1	ATB-DILI	TB	A4	1
DN-DIAN-11803	ATB-DILI_T2	ATB-DILI	TB	A4	2
DN-DIAN-11804	ATB-DILI_T3	ATB-DILI	TB	A4	3
DN-DIAN-11805	ATB-DILI_T4	ATB-DILI	TB	A4	4
DN-DIAN-11806	ATB-DILI_T5	ATB-DILI	TB	A4	5
DN-DIAN-11807	ATB-DILI_T1	ATB-DILI	TB	A5	1
DN-DIAN-11808	ATB-DILI_T2	ATB-DILI	TB	A5	2
DN-DIAN-11809	ATB-DILI_T3	ATB-DILI	TB	A5	3
DN-DIAN-11810	ATB-DILI_T4	ATB-DILI	TB	A5	4
DN-DIAN-11811	ATB-DILI_T5	ATB-DILI	TB	A5	5
DN-DIAN-11812	ATB-DILI_T1	ATB-DILI	TB	A6	1
DN-DIAN-11813	ATB-DILI_T2	ATB-DILI	TB	A6	2
DN-DIAN-11814	ATB-DILI_T3	ATB-DILI	TB	A6	3
DN-DIAN-11815	ATB-DILI_T4	ATB-DILI	TB	A6	4
DN-DIAN-11816	ATB-DILI_T5	ATB-DILI	TB	A6	5
DN-DIAN-11817	ATB-Ctrl_T1	ATB-Ctrl	TB	B4	1
DN-DIAN-11818	ATB-Ctrl_T2	ATB-Ctrl	TB	B4	2
DN-DIAN-11819	ATB-Ctrl_T3	ATB-Ctrl	TB	B4	3
DN-DIAN-11820	ATB-Ctrl_T4	ATB-Ctrl	TB	B4	4
DN-DIAN-11821	ATB-Ctrl_T5	ATB-Ctrl	TB	B4	5
DN-DIAN-11822	ATB-Ctrl_T1	ATB-Ctrl	TB	B5	1
DN-DIAN-11823	ATB-Ctrl_T2	ATB-Ctrl	TB	B5	2
DN-DIAN-11824	ATB-Ctrl_T3	ATB-Ctrl	TB	B5	3
DN-DIAN-11825	ATB-Ctrl_T4	ATB-Ctrl	TB	B5	4
DN-DIAN-11826	ATB-Ctrl_T5	ATB-Ctrl	TB	B5	5
DN-DIAN-11827	ATB-Ctrl_T1	ATB-Ctrl	TB	B6	1
DN-DIAN-11828	ATB-Ctrl_T2	ATB-Ctrl	TB	B6	2
DN-DIAN-11829	ATB-Ctrl_T3	ATB-Ctrl	TB	B6	3
DN-DIAN-11830	ATB-Ctrl_T4	ATB-Ctrl	TB	B6	4
DN-DIAN-11831	ATB-Ctrl_T5	ATB-Ctrl	TB	B6	5
DN-DIAN-11832	HC	HC	No	C7
DN-DIAN-11833	HC	HC	No	C8
DN-DIAN-11834	HC	HC	No	C9
DN-DIAN-11835	HC	HC	No	C10
DN-DIAN-11836	HC	HC	No	C11
DN-DIAN-11837	HC	HC	No	C12
DN-DIAN-11838	ATB-DILI_T1	ATB-DILI	TB	A7	1
DN-DIAN-11839	ATB-DILI_T2	ATB-DILI	TB	A7	2
DN-DIAN-11840	ATB-DILI_T3	ATB-DILI	TB	A7	3
DN-DIAN-11841	ATB-DILI_T4	ATB-DILI	TB	A7	4
DN-DIAN-11842	ATB-DILI_T5	ATB-DILI	TB	A7	5
DN-DIAN-11843	ATB-DILI_T1	ATB-DILI	TB	A8	1
DN-DIAN-11844	ATB-DILI_T2	ATB-DILI	TB	A8	2
DN-DIAN-11845	ATB-DILI_T3	ATB-DILI	TB	A8	3
DN-DIAN-11846	ATB-DILI_T4	ATB-DILI	TB	A8	4
DN-DIAN-11847	ATB-DILI_T5	ATB-DILI	TB	A8	5
DN-DIAN-11848	ATB-DILI_T1	ATB-DILI	TB	A9	1
DN-DIAN-11849	ATB-DILI_T2	ATB-DILI	TB	A9	2
DN-DIAN-11850	ATB-DILI_T3	ATB-DILI	TB	A9	3
DN-DIAN-11851	ATB-DILI_T4	ATB-DILI	TB	A9	4
DN-DIAN-11852	ATB-DILI_T5	ATB-DILI	TB	A9	5
DN-DIAN-11853	ATB-Ctrl_T1	ATB-Ctrl	TB	B7	1
DN-DIAN-11854	ATB-Ctrl_T2	ATB-Ctrl	TB	B7	2
DN-DIAN-11855	ATB-Ctrl_T3	ATB-Ctrl	TB	B7	3
DN-DIAN-11856	ATB-Ctrl_T4	ATB-Ctrl	TB	B7	4
DN-DIAN-11857	ATB-Ctrl_T5	ATB-Ctrl	TB	B7	5
DN-DIAN-11858	ATB-Ctrl_T1	ATB-Ctrl	TB	B8	1
DN-DIAN-11859	ATB-Ctrl_T2	ATB-Ctrl	TB	B8	2
DN-DIAN-11860	ATB-Ctrl_T3	ATB-Ctrl	TB	B8	3
DN-DIAN-11861	ATB-Ctrl_T4	ATB-Ctrl	TB	B8	4
DN-DIAN-11862	ATB-Ctrl_T5	ATB-Ctrl	TB	B8	5
DN-DIAN-11863	ATB-Ctrl_T1	ATB-Ctrl	TB	B9	1
DN-DIAN-11864	ATB-Ctrl_T2	ATB-Ctrl	TB	B9	2
DN-DIAN-11865	ATB-Ctrl_T3	ATB-Ctrl	TB	B9	3
DN-DIAN-11866	ATB-Ctrl_T4	ATB-Ctrl	TB	B9	4
DN-DIAN-11867	ATB-Ctrl_T5	ATB-Ctrl	TB	B9	5
DN-DIAN-11868	HC	HC	No	C13
DN-DIAN-11869	HC	HC	No	C14
DN-DIAN-11870	HC	HC	No	C15
DN-DIAN-11871	HC	HC	No	C16
DN-DIAN-11872	HC	HC	No	C17
DN-DIAN-11873	HC	HC	No	C18
